# Supplementary material for: When homoplasy mimics hybridization: a case study of Cape hakes (Merluccius capensisandM. paradoxus)
Source: PeerJ journal article supplement (doi:10.7717/peerj.1827), 2016-03-28

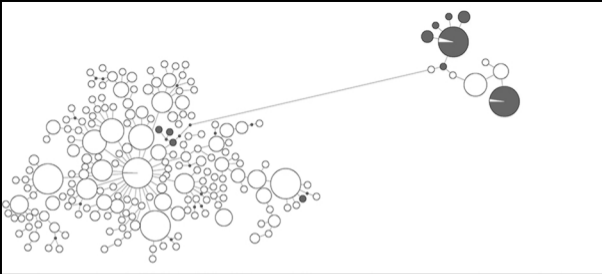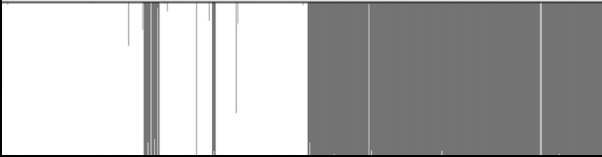

Supplement: Figure_S2.pdf [file Figure_S2.pdf]
