# Supplementary material for: When homoplasy mimics hybridization: a case study of Cape hakes (Merluccius capensis and M. paradoxus)
Source: PubMed Central journal article supplement (PMC4824878; doi:10.7717/peerj.1827), 2016-03-28

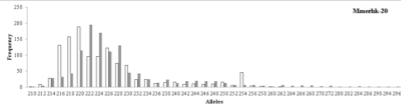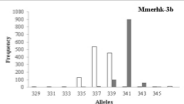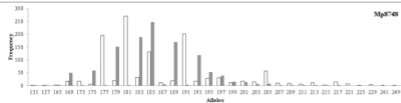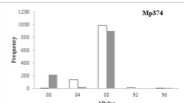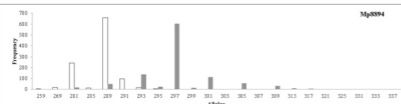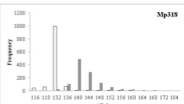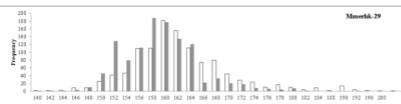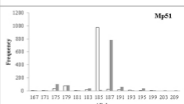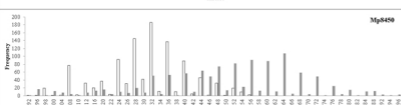

Supplement: peerj-04-1827-s002.pdf [file peerj-04-1827-s002.pdf]
