# Supplementary material for: When homoplasy mimics hybridization: a case study of Cape hakes (Merluccius capensis and M. paradoxus)
Source: PeerJ. 2016 Mar 28;4:e1827. doi: 10.7717/peerj.1827 (PMC4824878; doi:10.7717/peerj.1827)
Supplement: Supplemental Information 1 — Microsatellite database for M. capensis and M. paradoxus [file peerj-04-1827-s001.xlsx]

## Sheet: Henriques et al-database
	MP318		MP8748		MP51		MP8894		MP374		MP8450		Mm20		Mm29		Mm3b
12_C4N_1	140	152	177	177	187	187	297	297	84	88	238	246	230	254	162	164	329	329
12_C4N_3	140	140	181	185	187	187	299	299	88	88	220	238	220	224	164	176	327	327
12_C4N_4	140	140	189	195	187	187	293	297	88	88	230	242	218	220	160	160	329	329
12_C4N_5	140	140	205	215	187	187	297	297	88	88	234	246	220	234	164	170	329	329
12_C4N_6	140	140	181	191	187	187	297	297	88	88	226	226	216	222	166	172	327	327
12_C4N_8	140	140	181	197	187	187	293	297	88	88	242	242	218	230	156	162	329	329
12_C4N_9	140	140	177	177	187	187	293	293	88	88	220	242	226	234	154	164	329	329
12_C4N_10	140	140	181	191	179	187	297	297	88	88	250	250	224	244	170	174	327	327
12_C4N_11	140	140	191	205	187	187	297	297	88	88	238	266	218	242	164	164	327	327
12_C4N_12	140	140	185	191	187	187	297	297	88	92	242	246	216	250	156	166	327	329
12_C4N_13	140	140	183	195	187	187	297	297	88	88	242	246	222	228	158	158	327	327
12_C4N_14	140	172	177	181	187	187	297	297	84	88	238	266	216	218	160	162	327	327
12_C4N_17	140	140	181	217	187	187	297	301	88	88	226	226	218	228	160	162	327	327
12_C4N_20	140	140	181	181	187	187	297	299	88	88	234	236	226	228	162	170	327	327
12_P25N_19C	140	140	187	191	187	187	297	297	88	88	234	238	224	232	156	164	341	341
12_C89N_1	140	140	183	191	187	187	289	293	88	88	220	220	226	228	156	168	329	329
12_C89N_2	140	144	175	191	187	187	293	293	88	88	220	238	220	238	154	158	325	329
12_C89N_3	140	140	177	213	179	187	299	299	88	88	226	238	220	250	158	164	329	329
12_C89N_4	136	140	177	205	187	187	289	289	88	88	238	246	218	228	150	164	329	329
12_C89N_5	140	140	181	181	187	187	-9	-9	88	88	-9	-9	216	224	160	160	329	329
12_C89N_6	140	140	185	195	175	187	293	293	88	88	242	242	220	222	154	162	329	329
12_C89N_7	140	140	201	205	183	187	293	293	84	88	238	246	216	242	160	160	329	329
12_C89N_8	140	140	179	217	187	187	293	293	84	84	234	250	220	242	162	166	325	325
12_C89N_9	140	140	181	181	179	187	293	293	88	88	234	258	226	228	160	166	325	325
12_C89N_10	140	140	177	229	187	187	293	293	88	88	230	246	218	254	168	172	325	329
12_C89N_11	140	140	181	201	187	187	293	293	88	88	212	234	224	254	156	168	325	329
12_C89N_12	140	140	173	177	187	187	289	293	88	88	234	246	218	224	160	162	329	329
12_C89N_13	140	140	185	185	187	187	-9	-9	88	88	-9	-9	218	254	156	156	329	329
12_C89N_14	140	140	191	191	187	187	293	293	88	88	238	242	218	254	170	170	329	329
12_C89N_15	140	140	185	197	187	199	293	295	84	88	238	242	216	238	162	166	325	325
12_C89N_16	140	140	185	197	187	199	293	295	84	88	238	242	224	228	162	162	325	329
12_C89N_17	140	140	181	181	175	191	289	293	84	88	236	242	222	224	160	162	325	329
12_C89N_18	140	144	185	191	187	187	293	293	84	88	236	238	220	234	164	166	329	329
12_C89N_19	140	140	191	209	187	187	293	293	84	88	230	234	218	244	160	164	329	329
12_C89N_20	140	140	181	203	187	187	293	293	84	88	238	242	214	226	160	164	329	329
12_C89N_21	140	140	181	191	187	187	-9	-9	88	88	242	250	220	254	158	164	325	329
12_C89N_22	140	140	177	195	179	187	293	293	88	88	236	242	216	220	164	166	329	329
12_C89N_23	140	140	181	181	187	187	293	293	88	88	228	242	218	254	150	160	329	329
12_C89N_24	140	140	191	197	187	187	293	293	88	88	236	242	222	226	154	162	329	329
12_C89N_26	140	140	177	181	175	187	299	299	88	88	236	240	216	230	164	164	325	329
12_C89N_27	132	140	183	191	187	191	293	293	88	88	242	250	222	244	160	164	325	329
12_C89N_28	140	140	173	205	187	195	293	293	88	88	220	238	212	232	158	158	329	329
12_C89N_29	140	140	181	183	187	187	293	293	88	88	226	238	220	254	148	170	325	329
12_C192N_1	140	140	195	213	187	187	297	297	88	88	220	250	216	226	154	162	327	329
12_C192N_2	140	140	177	191	187	187	293	299	88	88	242	242	220	224	172	174	329	329
12_C192N_3	140	140	195	217	187	187	297	297	84	84	226	250	216	222	154	178	327	327
12_C192N_4	140	140	181	191	187	187	289	297	88	88	228	234	232	254	164	194	327	329
12_C192N_5	140	140	181	185	187	187	293	293	84	88	240	246	214	218	154	154	329	329
12_C192N_6	140	140	185	217	187	187	297	297	-9	-9	226	234	220	230	162	170	327	327
12_C192N_8	136	136	177	185	187	187	297	301	88	88	-9	-9	218	234	164	166	325	327
12_C192N_9	136	136	181	185	179	187	-9	-9	84	88	-9	-9	218	226	166	176	325	327
12_C192N_11	140	140	191	209	187	187	297	297	88	88	234	242	220	230	154	164	327	327
12_C192N_12	140	140	179	185	187	187	297	297	88	92	254	254	218	234	166	168	327	327
12_C192N_13	140	140	191	191	179	187	293	293	84	88	242	242	226	228	160	172	327	329
12_C192N_17	136	140	181	191	187	187	297	297	88	88	238	248	220	228	180	180	327	327
12_C192N_18	140	140	185	185	187	187	297	297	88	88	230	242	216	224	160	164	327	327
12_C192N_19	136	140	191	197	187	187	297	297	84	88	220	258	220	224	154	160	327	329
12_C195bN_1	136	140	181	185	187	187	293	293	84	88	246	250	222	228	158	178	325	329
12_C195bN_2	136	140	181	181	187	187	299	299	88	88	238	246	220	220	154	166	325	329
12_C195bN_3	140	140	177	181	187	187	293	293	84	88	242	242	216	240	160	166	325	325
12_C195bN_4	140	140	169	177	187	199	293	295	88	88	220	240	218	220	164	164	325	329
12_C195bN_22	140	140	181	181	187	187	293	293	88	88	242	244	218	224	166	168	329	329
12_C195bN_23	132	140	177	181	187	187	293	293	88	88	220	246	224	228	170	170	325	329
12_C195bN_24	140	140	181	221	179	191	297	297	88	88	220	250	218	220	162	182	329	329
12_C195bN_25b	140	140	191	205	195	195	293	293	88	88	220	240	224	258	160	164	325	325
12_C195bN_26	136	136	181	191	187	187	293	293	84	84	220	234	218	220	158	162	325	329
12_C195bN_27	140	140	181	205	187	187	297	297	84	88	234	242	228	238	160	164	325	331
12_C195bN_28	144	144	185	197	187	187	293	293	88	88	226	246	218	232	162	190	329	329
12_C195bN_30	140	140	177	181	179	187	289	293	88	88	242	250	216	222	166	184	329	329
12_C195N_1	140	140	177	191	175	187	297	299	88	88	234	250	222	228	158	178	325	329
12_C195N_2	140	140	177	185	175	187	293	297	84	84	240	246	220	220	154	166	325	329
12_C195N_3	140	140	185	191	187	187	293	293	84	84	262	262	216	240	160	166	325	325
12_C195N_4	140	140	181	191	187	187	297	297	88	88	220	246	218	220	164	164	325	329
12_C195N_5	140	140	181	185	187	187	299	299	88	88	234	244	214	230	162	164	329	329
12_C196N_2	140	140	177	181	187	187	297	297	88	88	242	246	212	224	162	162	327	327
12_C196N_3	144	144	169	181	187	187	293	293	88	88	234	242	226	230	158	176	327	329
12_C196N_4	140	140	177	181	187	187	297	297	88	88	220	240	226	228	158	158	329	329
12_C196N_10	140	140	181	191	179	187	293	297	88	88	242	242	226	254	152	174	327	327
12_C196N_12	144	144	169	181	187	187	293	293	88	88	234	242	218	236	-9	-9	327	327
12_C196N_13	140	140	177	181	187	187	293	297	88	88	220	240	222	222	166	196	329	329
12_C196N_14	140	140	177	181	187	187	297	297	88	88	242	246	218	222	158	162	327	329
12_C196N_15	140	144	181	185	187	187	297	297	88	88	226	242	218	220	170	170	329	329
12_C196N_16	140	140	177	193	187	187	293	293	88	88	234	242	216	226	152	160	327	327
12_C196N_17	140	140	177	181	187	187	289	293	88	88	246	250	218	222	170	170	327	327
12_C196N_18	140	140	181	195	187	191	289	289	88	88	220	238	226	248	156	166	325	329
12_C196N_19	140	140	181	197	187	187	297	297	88	88	220	230	222	234	152	180	325	327
12_C196N_20	140	140	185	191	187	187	293	297	88	88	226	242	220	220	160	164	329	329
12_C196N_21	140	140	181	181	187	187	293	293	84	88	212	234	220	228	-9	-9	327	329
12_C210N_1	140	140	181	191	187	187	297	297	84	84	246	252	220	228	160	174	329	329
12_C210N_2	140	140	181	181	187	195	-9	-9	88	88	220	234	218	230	168	176	329	329
12_C210N_4	140	140	173	185	187	187	-9	-9	88	88	-9	-9	222	222	162	170	327	329
12_C210N_5	140	140	169	181	187	187	289	293	88	88	242	254	230	230	162	180	325	329
12_C210N_6	140	176	177	181	187	187	293	297	88	88	240	254	220	226	174	176	329	329
12_C210N_7	140	140	181	191	187	187	-9	-9	84	88	246	254	218	260	154	166	329	329
12_C210N_8	140	140	181	191	183	187	-9	-9	88	88	-9	-9	218	220	150	164	325	329
12_C210N_9	140	144	191	191	187	187	289	293	88	88	246	262	222	226	162	164	329	329
12_C210N_10	140	140	177	183	187	195	-9	-9	84	88	-9	-9	216	222	160	170	329	329
12_C210N_12	140	140	181	207	187	187	293	293	88	88	212	242	220	224	164	164	329	329
12_C210N_16	140	140	179	209	187	187	293	293	88	88	242	246	224	236	162	172	325	327
12_C210N_20	140	140	179	213	187	187	293	293	88	88	246	246	226	236	156	170	325	329
12_C210N_21	140	140	181	221	187	187	293	293	88	88	238	238	218	224	144	158	325	329
12_C210N_22	140	140	169	189	187	187	293	293	84	88	266	266	224	254	158	158	329	329
12_C210N_23	140	140	181	183	187	199	-9	-9	84	88	230	230	224	230	162	162	329	329
12_C210N_24	136	140	181	181	187	187	-9	-9	88	88	-9	-9	216	228	160	160	325	329
12_C210N_28	140	140	191	191	187	187	-9	-9	84	84	-9	-9	218	228	162	180	329	329
12_C210N_29	140	140	181	191	187	187	293	293	84	88	242	262	238	254	164	164	325	329
12_C210N_30	140	140	185	191	187	199	293	293	84	88	236	238	218	226	160	166	325	329
12_C54W_7	140	140	177	181	187	187	-9	-9	88	88	-9	-9	216	216	160	160	323	327
12_C54W_8	132	132	177	181	187	187	-9	-9	88	88	220	236	216	220	152	166	327	327
12_C54W_13	140	140	181	217	187	187	297	297	88	88	238	240	222	224	162	168	327	329
12_C54W_14	140	140	173	177	187	191	297	297	88	88	246	246	222	230	166	176	327	329
12_C54W_15	140	140	189	191	187	187	297	297	88	88	240	246	218	226	154	154	325	329
12_C54W_16	132	132	181	181	187	187	297	297	-9	-9	-9	-9	218	246	160	166	327	327
12_C54W_17	140	140	173	181	187	187	297	297	-9	-9	242	242	220	224	-9	-9	327	329
12_C56W_12	132	140	191	203	179	187	299	299	88	88	238	242	230	230	156	162	325	329
12_C56W_13	140	140	181	213	187	187	297	297	88	88	238	242	218	220	164	164	327	329
12_C56W_14	140	140	177	191	187	187	285	297	88	88	220	242	214	222	166	166	329	329
12_C56W_17	140	140	181	205	187	187	297	297	-9	-9	226	238	218	228	154	164	329	329
12_C56W_18	132	140	193	195	175	187	297	297	88	88	238	242	216	222	162	172	325	327
12_C57W_13	136	140	181	185	187	187	297	297	88	92	240	250	222	230	-9	-9	329	329
12_C57W_14	140	140	187	187	187	187	297	297	88	88	238	258	226	226	164	166	327	329
12_C57W_15	140	140	179	181	187	187	297	297	88	88	220	246	218	228	164	170	327	327
12_C57W_17	132	140	175	191	187	187	297	297	88	88	226	246	216	222	-9	-9	327	327
12_C57W_18	140	140	181	195	187	187	297	297	88	88	242	250	224	254	162	162	327	327
12_C57W_19	132	140	185	213	187	195	297	297	88	88	240	242	220	226	156	164	329	331
12_C64W_1	140	140	177	203	175	187	297	297	88	88	230	246	218	228	160	160	327	329
12_C64W_3	140	140	187	191	187	187	297	297	84	84	220	234	216	220	162	162	327	327
12_C64W_4	140	140	177	181	187	187	297	297	88	88	246	246	218	226	160	160	329	329
12_C64W_5	140	144	177	181	187	187	-9	-9	88	88	-9	-9	218	218	158	160	329	329
12_C64W_8	140	144	181	185	183	191	297	297	88	88	220	238	222	222	172	172	327	327
12_C64W_9	140	140	181	185	187	187	297	297	88	88	250	250	218	226	164	168	321	325
12_C64W_10	136	140	183	185	187	187	297	297	88	88	238	238	220	222	160	198	327	327
12_C94W_2	140	140	177	185	187	187	297	297	88	88	212	234	216	218	170	170	327	327
12_C94W_5	140	140	179	221	187	187	297	297	88	88	220	246	216	220	164	168	327	329
12_C94W_6	140	140	173	185	187	187	297	297	88	88	220	254	226	230	158	158	327	329
12_C94W_9	140	140	181	193	179	187	297	297	88	88	240	242	220	222	154	166	327	329
12_C94W_10	140	140	177	185	187	187	297	297	88	88	212	234	216	218	170	170	327	327
12_C94W_11	140	140	191	191	187	187	-9	-9	88	88	-9	-9	216	224	158	158	327	327
12_C94W_13	140	140	201	205	187	187	297	299	88	88	250	258	220	230	162	190	327	327
12_C94W_14	140	140	181	191	187	187	297	299	88	88	226	242	240	254	158	168	327	327
12_C94W_15	140	140	181	191	187	187	297	299	88	88	226	242	240	254	158	166	327	327
12_C94W_16	140	140	191	205	187	187	297	297	84	88	242	258	216	224	166	190	325	329
12_C94W_17	140	140	185	191	187	187	297	299	84	88	234	242	216	226	154	170	327	329
12_C94W_18	140	144	185	203	187	187	297	297	88	92	212	246	216	230	160	164	327	327
12_C96W_11	140	140	177	191	187	187	297	297	88	88	250	254	222	224	158	160	327	329
12_C96W_12	140	140	191	205	187	187	297	297	88	88	220	242	224	230	154	182	327	329
12_C96W_14	140	140	177	181	187	187	297	297	88	88	220	258	220	230	164	188	329	329
12_C96W_15	140	140	181	205	187	187	297	297	88	88	228	246	222	224	152	160	327	329
12_C102W_1	140	140	181	181	187	187	297	297	88	88	234	236	222	224	160	166	327	329
12_C102W_2	140	140	185	185	187	187	293	299	-9	-9	246	246	218	246	162	162	327	329
12_C102W_3	148	148	181	191	175	191	-9	-9	88	88	238	246	224	226	172	172	327	327
12_C102W_5	140	140	179	221	187	187	297	297	88	88	220	246	216	220	164	168	327	329
12_C102W_6	140	140	173	185	187	187	297	297	88	88	220	254	226	230	158	158	327	329
12_C102W_8	140	140	181	195	179	187	297	299	88	88	212	220	230	252	152	156	327	327
12_C1SW_3	140	140	177	181	175	187	297	297	88	88	242	246	212	248	166	170	327	327
12_C1SW_9	140	140	177	191	187	187	297	297	88	88	250	258	228	240	158	158	327	327
12_C1SW_10	140	140	181	207	187	187	297	297	88	88	250	250	224	226	162	162	327	329
12_C1SW_12	144	144	185	191	179	187	297	297	84	88	228	246	214	228	166	166	327	327
12_C1SW_13	140	140	177	201	187	187	297	297	80	88	238	258	222	238	162	162	327	329
12_C1SW_15	140	140	179	189	181	187	-9	-9	88	88	-9	-9	210	226	152	152	327	327
12_C1SW_17	132	140	177	185	187	187	297	299	-9	-9	220	242	224	230	158	172	327	327
12_C1SW_18	140	140	177	191	187	191	297	299	88	88	246	246	226	254	162	164	327	329
12_C1SW_20	140	140	205	217	187	187	297	297	88	88	226	236	228	258	156	166	327	329
12_C1SW_21	140	140	185	205	181	187	297	297	88	88	232	232	218	222	-9	-9	327	327
12_C1SW_22	140	140	181	217	181	187	297	299	-9	-9	242	244	216	228	166	166	327	327
12_C1SW_23	140	140	177	191	181	187	297	297	88	88	262	266	220	222	-9	-9	327	327
12_C1SW_26	132	132	209	213	187	187	297	297	88	88	220	250	224	226	164	168	327	327
12_C1SW_27	140	140	181	181	181	187	297	297	-9	-9	220	238	216	222	154	172	327	327
12_C1SW_28	136	136	177	193	187	187	-9	-9	88	88	220	230	224	234	174	182	327	327
12_C1SW_30	132	140	191	221	181	187	297	297	-9	-9	232	238	216	230	170	182	327	329
12_C1SW_31	140	144	191	191	181	187	297	299	88	88	-9	-9	214	218	-9	-9	327	327
12_C1SW_33	132	140	179	183	187	187	297	297	88	88	238	238	220	228	174	174	327	327
12_C2aSW_1	140	140	177	181	163	187	297	297	88	88	238	246	224	240	162	162	327	327
12_C2aSW_2	140	140	181	199	175	187	297	297	88	88	218	242	222	228	-9	-9	327	327
12_C2aSW_5	140	140	169	213	187	187	297	297	88	88	238	242	218	220	160	184	327	327
12_C2aSW_6	136	140	177	191	187	187	297	297	88	88	228	250	224	234	154	176	327	329
12_C2aSW_7	140	140	173	181	187	187	297	301	88	88	220	242	228	230	162	200	327	329
12_C2aSW_8	140	140	185	191	187	187	299	299	88	88	246	246	224	226	176	190	327	327
12_C2aSW_9	136	140	191	195	179	187	297	297	88	88	234	246	216	234	160	162	327	327
12_C2aSW_10	140	140	177	211	187	187	297	297	88	88	234	234	220	248	162	172	327	327
12_C9aSW_15	140	140	177	181	187	187	297	299	88	88	238	258	220	226	154	162	327	327
12_C9aSW_16	140	140	185	205	187	187	297	299	88	88	242	254	220	220	146	158	327	327
12_C9aSW_17	140	140	173	189	187	187	297	297	88	88	234	250	220	224	168	168	327	327
12_C9aSW_20	140	144	181	199	175	187	293	297	88	88	-9	-9	220	240	154	166	327	327
12_C11SW_11	140	140	181	205	187	187	297	297	88	88	234	258	220	224	170	186	327	327
12_C11SW_13	140	140	181	185	187	187	297	297	88	88	-9	-9	220	222	164	164	327	327
12_C11SW_14	140	140	181	197	187	187	297	297	88	88	-9	-9	218	230	164	164	327	327
12_C11SW_15	140	140	177	181	187	187	297	301	88	88	250	250	218	222	164	166	327	329
12_C11SW_16	140	140	183	191	187	187	297	297	88	88	238	242	224	226	158	162	327	327
12_C11SW_17	140	140	177	191	187	187	-9	-9	88	88	-9	-9	236	254	164	164	327	327
12_C11SW_19	140	144	177	191	179	187	297	297	88	88	228	232	222	226	158	168	327	327
12_C15SW_11	140	140	181	181	187	187	297	297	88	88	238	246	216	218	160	190	327	329
12_C15SW_12	132	140	177	191	183	187	297	297	88	88	246	250	218	232	162	168	327	327
12_C15SW_13	140	140	181	185	187	187	297	297	88	88	250	258	218	232	172	172	327	327
12_C15SW_14	136	140	177	191	179	187	-9	-9	88	88	-9	-9	214	226	160	164	327	329
12_C15SW_15	140	140	175	191	183	187	297	297	88	88	238	238	224	240	168	168	327	327
12_C15SW_16	140	140	181	195	187	187	-9	-9	88	88	-9	-9	226	232	162	166	327	327
12_C15SW_19	140	140	191	209	187	187	297	297	84	88	242	242	226	230	166	186	325	327
12_C15SW_20	140	144	181	203	187	187	297	297	84	88	230	258	220	220	160	162	325	327
12_C15SW_21	140	140	177	183	187	187	297	297	88	88	226	246	226	226	166	180	327	327
12_C15SW_22	140	140	177	177	187	191	-9	-9	84	88	-9	-9	220	238	156	172	327	327
12_C15SW_23	140	140	181	203	179	187	297	297	88	88	226	238	220	240	172	172	327	327
12_C15SW_24	140	140	181	185	179	191	297	297	88	88	234	250	218	230	158	158	325	327
12_C15SW_25	140	140	181	185	187	187	297	297	88	88	212	246	232	242	166	166	327	327
12_C15SW_26	140	140	177	191	187	187	297	299	88	88	234	254	226	242	-9	-9	327	329
12_C15SW_27	132	140	179	185	187	187	297	297	88	88	238	242	218	220	154	160	325	327
12_C15SW_28	140	140	193	201	187	187	297	299	88	88	238	238	220	228	158	166	327	329
12_C15SW_29	140	140	185	229	187	187	297	297	88	88	234	246	220	222	146	174	327	327
12_C15SW_30	140	140	177	181	187	187	297	297	88	88	242	246	218	226	162	170	327	327
12_C16SW_1	140	140	191	191	187	187	297	297	88	88	238	242	220	240	162	172	327	329
12_C16SW_2	140	140	181	191	175	187	297	297	88	92	238	242	222	224	162	172	327	327
12_C16SW_4	140	140	177	181	187	187	297	297	88	88	-9	-9	216	218	166	166	-9	-9
12_C16SW_5	140	140	181	185	187	187	-9	-9	88	88	-9	-9	220	220	174	174	327	327
12_C16SW_6	140	140	191	203	179	187	297	297	88	88	240	262	218	220	164	164	327	329
12_C16SW_7	140	140	177	181	187	187	297	297	88	88	240	242	218	224	162	162	327	329
12_C16SW_8	140	140	181	215	187	187	297	297	88	88	230	238	220	226	170	170	327	327
12_C16SW_9	140	140	181	185	187	187	297	297	88	88	226	258	226	232	160	170	325	327
12_C16SW_10	140	140	187	191	187	187	297	299	88	88	240	240	216	226	152	174	327	329
12_C25aSW_19	140	140	177	191	187	187	-9	-9	88	88	-9	-9	224	250	160	164	327	327
12_C25aSW_20	140	140	199	205	187	187	297	297	88	88	228	250	218	230	158	166	327	327
12_C25bSW_33	140	140	191	193	179	187	297	297	88	88	234	242	238	254	164	168	327	329
12_C25bSW_34	132	140	177	185	187	187	297	297	88	88	220	242	220	220	172	174	327	327
12_C2S_2	136	144	177	191	187	187	297	297	88	88	236	254	220	232	162	172	327	329
12_C2S_3	140	140	217	225	183	187	297	297	88	88	234	240	220	234	158	162	327	327
12_C2S_5	140	140	177	177	187	187	297	297	88	88	234	246	230	230	170	176	327	327
12_C2S_6	140	144	181	201	187	187	297	297	88	88	228	230	220	226	160	182	323	327
12_C2S_8	140	140	185	185	187	187	-9	-9	88	88	-9	-9	224	226	166	168	327	329
12_C4AS_1	140	140	199	205	179	191	297	297	88	88	226	242	216	220	162	162	327	341
12_C4AS_2	140	140	191	191	179	187	297	297	88	88	-9	-9	220	256	-9	-9	327	327
12_C4AS_4	140	144	181	191	179	187	297	297	88	88	238	250	218	230	156	162	327	341
12_C4AS_5	140	140	181	185	187	191	297	297	88	88	212	250	218	224	160	164	327	327
12_C4AS_6	140	140	177	185	187	187	297	297	88	88	238	266	214	226	158	164	327	327
12_C4AS_7	132	140	177	189	187	187	297	301	88	88	220	238	236	244	160	170	327	329
12_C4AS_8	140	140	181	205	187	195	297	297	88	88	246	246	218	254	166	172	327	327
12_C4AS_9	132	140	181	191	187	187	297	297	88	88	242	250	218	218	156	184	327	341
12_C4AS_10	140	140	185	197	187	187	297	297	88	88	-9	-9	224	226	158	170	327	341
12_C4bS_1	136	140	181	181	187	187	297	297	88	88	220	234	220	254	160	162	327	327
12_C4bS_2	140	140	173	185	179	187	297	299	88	88	238	242	230	246	158	160	327	327
12_C4bS_3	140	140	177	191	187	191	297	297	88	88	212	242	228	230	156	166	329	329
12_C4bS_4	140	140	181	191	187	187	297	299	88	88	212	244	216	222	156	158	325	327
12_C4bS_5	140	140	177	191	187	187	297	297	88	88	230	246	220	226	158	158	327	327
12_C4bS_6	140	140	181	191	187	187	297	299	88	88	226	246	230	250	158	168	327	329
12_C4bS_7	140	140	179	191	179	187	297	297	88	88	238	238	216	220	164	168	327	329
12_C4bS_8	140	140	177	217	187	187	297	297	88	92	234	238	230	230	162	164	327	327
12_C4bS_9	140	140	177	181	187	187	297	297	88	88	234	242	226	226	162	164	327	329
12_C4bS_10	140	140	181	191	187	187	297	299	88	88	226	240	216	230	158	162	327	329
12_C4bS_11	140	140	177	185	187	187	297	297	88	88	242	246	218	224	160	162	327	327
12_C4bS_12	140	140	185	185	179	187	297	297	88	88	242	250	218	220	164	174	325	327
12_C4bS_13	132	140	177	191	187	187	297	297	88	88	220	246	224	228	152	158	327	327
12_C4bS_14	140	140	177	181	187	187	297	297	88	88	238	250	216	220	164	186	323	329
12_C4bS_16	140	140	181	185	187	187	297	297	88	88	220	226	216	232	152	158	327	329
12_C4bS_17	140	140	191	193	187	187	297	297	88	88	234	238	238	238	158	158	327	327
12_C4bS_18	140	140	165	181	187	187	297	297	88	88	234	254	226	238	160	160	327	327
12_C4bS_19	140	140	181	185	187	187	297	297	88	88	212	254	228	230	170	176	329	329
12_C7S_4	140	140	177	209	187	187	297	297	88	88	238	254	216	220	166	172	327	327
12_C7S_6	140	140	169	201	187	187	297	297	88	88	242	246	216	236	154	164	327	329
12_C7S_10	140	140	191	195	187	187	297	297	88	88	234	234	230	252	162	170	327	327
12_C9S_3	140	140	191	191	187	187	297	301	88	88	236	246	220	224	164	164	327	327
12_C9S_5	140	140	177	201	179	187	297	299	88	88	220	254	214	220	158	158	327	327
12_C9S_7	140	140	177	191	179	187	297	297	88	88	246	266	218	220	158	166	327	327
12_C9S_8	140	140	181	203	187	187	297	299	88	88	246	250	226	230	154	164	327	327
12_C9S_10	140	140	177	191	187	187	297	297	88	88	242	250	218	220	156	168	327	327
12_C9S_11	140	140	185	197	179	187	-9	-9	88	88	230	234	218	220	164	164	327	327
12_C9S_12	140	168	173	189	183	187	293	297	84	88	248	256	218	224	162	162	327	327
12_C9S_16	140	140	181	191	187	187	297	297	88	88	238	258	214	214	158	158	335	341
12_C9S_20	132	140	177	181	187	187	297	297	88	88	220	230	224	256	154	158	-9	-9
13_C1S_271	140	140	177	191	175	187	297	297	96	96	218	234	218	222	152	152	327	327
13_C1S_272	140	140	169	203	187	187	297	297	88	88	-9	-9	220	236	160	170	327	329
13_C1S_273	140	140	173	187	183	183	-9	-9	88	88	-9	-9	222	254	164	182	327	327
13_C1S_274	140	140	177	177	187	187	297	297	88	88	228	238	222	226	166	184	327	327
13_C1S_277	140	140	175	189	179	185	293	293	88	88	-9	-9	220	226	158	160	327	329
13_C8S_217	140	144	177	181	179	187	297	299	-9	-9	234	254	220	222	164	172	327	329
13_C8S_218	140	140	181	185	187	187	297	297	-9	-9	242	262	220	220	164	164	327	327
13_C8S_219	140	144	183	183	179	187	297	297	88	92	226	246	226	230	166	172	327	327
13_C8S_222	132	140	185	197	187	187	297	297	88	88	238	242	218	218	150	164	327	327
13_C8S_224	140	140	177	181	187	203	297	297	84	88	238	258	214	224	166	192	327	327
13_C8S_225	140	140	201	205	187	187	297	301	88	88	242	246	230	234	166	196	327	327
13_C8S_211	132	144	177	183	187	191	297	297	92	92	240	250	218	224	164	164	-9	-9
13_C8S_225	140	140	201	205	187	187	297	301	88	88	242	246	230	232	164	194	327	327
13_C8S_226	140	140	241	249	187	187	-9	-9	88	88	242	250	218	226	156	168	327	327
13_C8S_229	140	144	177	181	187	187	297	297	88	88	234	238	216	220	152	162	327	329
13_C8S_230	140	140	177	181	187	187	297	297	84	88	236	238	220	224	162	190	341	341
13_C28S_251	132	140	185	185	187	187	297	299	88	88	234	238	220	254	142	162	327	329
13_C28S_252	140	140	185	191	187	187	297	297	88	88	250	250	222	222	154	176	327	329
13_C28S_253	140	140	181	193	179	187	297	297	84	84	234	254	220	226	152	164	327	327
13_C28S_254	140	140	181	185	183	187	-9	-9	88	88	-9	-9	224	226	158	158	327	327
13_C28S_255	140	144	177	177	187	187	295	295	88	88	-9	-9	232	246	156	166	327	327
13_C28S_256	140	140	181	195	179	191	297	297	88	88	220	234	216	222	156	172	309	325
13_C28S_257	140	140	177	191	175	187	297	297	88	88	220	242	216	228	164	168	327	327
13_C28S_258	136	140	173	191	187	187	297	297	88	88	238	238	214	226	162	162	327	327
13_C28S_259	136	140	177	177	187	187	297	297	88	88	242	246	216	222	160	162	327	327
13_C28S_260	136	140	195	199	179	187	297	297	88	88	236	246	218	220	166	172	327	327
13_C28S_261	140	140	135	191	187	187	297	301	88	88	242	258	224	228	156	158	327	327
13_C28S_262	136	140	169	181	175	187	297	299	88	88	240	240	220	226	160	182	327	327
13_C28S_263	140	140	181	191	187	187	297	297	84	88	234	236	226	236	156	188	327	327
13_C28S_264	140	140	-9	-9	187	187	297	299	88	88	-9	-9	228	232	164	164	327	327
13_C28S_265	140	140	181	191	187	195	297	297	88	88	212	242	218	222	164	170	325	327
13_C28S_266	140	140	191	205	187	187	297	297	88	88	216	246	218	228	168	172	323	327
13_C28S_267	140	140	177	191	187	187	297	297	88	88	240	258	224	226	158	158	327	329
13_C28S_268	140	140	183	191	175	187	297	297	88	88	250	254	222	224	158	166	327	327
13_C28S_269	144	144	177	177	187	187	297	297	88	88	-9	-9	218	220	166	168	327	329
13_C28S_270	140	140	177	191	187	187	297	303	88	88	208	242	-9	-9	160	162	-9	-9
13_C1SW_1	140	140	185	205	187	187	297	297	88	88	246	246	218	234	162	166	327	327
13_C1SW_2	140	140	191	205	187	187	297	297	88	88	228	246	220	228	166	168	327	329
13_C1SW_3	140	140	185	191	175	187	297	297	88	88	220	242	216	234	158	164	327	329
13_C1SW_4	140	140	177	177	175	179	297	299	88	88	254	258	222	224	158	162	327	329
13_C1SW_5	140	140	191	191	175	187	297	297	84	88	238	242	218	226	162	178	327	327
13_C1SW_6	140	144	177	185	187	187	297	297	88	88	234	242	220	234	162	162	327	329
13_C1SW_7	140	144	177	185	187	187	297	297	88	88	234	246	220	220	162	178	327	327
13_C1SW_8	140	140	191	205	187	187	297	297	88	88	246	250	220	220	158	170	327	329
13_C1SW_9	140	140	191	217	187	187	297	299	88	88	246	258	216	220	162	166	327	329
13_C1SW_12	140	144	195	205	187	187	297	297	88	88	242	254	220	226	170	170	327	327
13_C1SW_13	140	140	177	181	187	187	297	297	88	88	246	250	224	228	160	168	327	329
13_C1SW_14	140	144	181	191	187	187	297	297	88	88	220	246	222	222	-9	-9	327	327
13_C1SW_15	140	140	183	183	187	187	297	299	88	88	242	262	216	218	160	164	327	327
13_C1SW_17	140	140	195	197	187	187	297	297	92	92	-9	-9	220	226	160	164	327	327
13_C1SW_18	140	140	185	197	187	187	297	297	88	88	-9	-9	216	242	160	162	327	327
13_C1SW_19	136	136	181	185	187	187	297	297	88	88	212	220	218	224	164	170	327	327
13_C2SW_1	140	144	181	191	187	187	297	297	88	88	242	250	216	224	162	166	327	327
13_C2SW_2	140	140	181	191	187	187	299	299	88	88	228	242	218	218	162	166	327	327
13_C2SW_3	140	140	181	197	187	187	297	299	88	88	248	248	214	220	162	168	327	327
13_C2SW_4	140	140	181	207	179	187	297	297	88	88	238	258	214	218	166	166	327	327
13_C2SW_5	140	140	181	197	187	187	297	297	88	88	238	250	216	218	160	164	327	327
13_C2SW_6	140	140	191	207	187	187	297	297	84	88	220	250	224	250	162	174	327	327
13_C2SW_7	140	140	191	207	187	187	299	299	88	88	244	250	218	234	162	186	327	329
13_C2SW_8	140	140	181	205	187	187	297	297	88	88	236	240	220	224	166	168	327	329
13_C9SW_1	140	140	187	195	187	187	297	297	88	88	238	244	218	220	158	160	327	329
13_C9SW_2	140	140	177	177	179	187	297	297	88	88	-9	-9	222	226	162	162	327	327
13_C9SW_4	140	140	191	205	187	191	297	297	88	88	240	250	224	226	162	170	327	327
13_C9SW_5	140	140	177	181	179	187	297	297	88	88	244	258	216	222	164	166	327	327
13_C9SW_6	140	144	181	183	187	187	297	301	88	88	242	262	222	226	162	166	325	329
13_C9SW_7	136	144	191	195	187	187	297	297	88	88	226	240	220	226	162	168	327	329
13_C9SW_8	140	140	177	181	187	187	297	297	88	88	236	242	218	220	162	166	327	327
13_C9SW_9	140	140	191	197	187	187	297	297	88	88	242	246	218	226	162	170	327	327
13_C9SW_10	140	140	177	185	183	187	297	297	88	88	238	242	220	226	162	172	327	327
13_C9SW_12	140	140	181	185	187	187	297	297	88	88	238	242	218	226	162	172	327	329
13_C9SW_13	140	140	181	195	187	187	297	297	88	88	230	242	216	250	156	162	327	329
13_C9SW_14	140	140	177	181	187	187	297	297	88	88	220	242	216	222	154	180	327	327
13_C9SW_15	140	144	193	193	175	187	297	297	88	88	196	252	224	228	156	164	327	341
13_C9SW_16	140	140	169	181	179	187	297	297	88	88	220	246	218	222	158	160	327	327
13_C9SW_17	136	140	181	189	179	187	297	297	88	88	234	238	226	234	172	172	327	327
13_C9SW_18	132	140	177	177	187	187	297	297	88	88	-9	-9	220	220	162	162	325	327
13_C9SW_19	140	140	181	201	175	187	297	297	88	88	238	250	224	224	162	164	327	327
13_C9SW_20	140	140	177	189	187	187	297	299	88	88	220	258	216	220	170	174	327	327
13_C10SW_1	140	140	175	191	175	187	297	297	88	88	220	242	216	224	160	162	327	329
13_C10SW_3	136	140	185	185	187	187	297	297	88	88	228	252	216	218	162	170	329	329
13_C10SW_5	140	140	191	193	187	195	293	297	88	88	236	236	218	222	164	164	327	327
13_C10SW_6	140	140	181	187	187	187	297	297	84	84	228	238	218	218	150	166	327	327
13_C10SW_7	140	140	181	191	187	187	297	297	84	84	228	246	218	222	162	164	327	329
13_C10SW_8	132	140	179	185	183	187	297	297	88	88	220	246	220	222	152	190	327	327
13_C10SW_9	136	140	177	195	179	187	297	299	88	88	242	254	224	240	164	164	327	327
13_C10SW_10	140	140	181	197	187	187	297	299	88	88	220	234	-9	-9	162	162	-9	-9
13_C10SW_12	140	140	185	191	187	187	297	297	88	88	230	246	216	216	162	170	327	329
13_C10SW_13	136	140	181	181	187	187	297	297	88	88	234	242	216	230	168	172	327	329
13_C10SW_14	140	140	177	197	187	191	297	297	88	88	228	246	226	236	158	160	327	327
13_C10SW_15	140	140	181	191	187	187	297	297	88	88	220	228	216	218	150	168	327	327
13_C10SW_16	140	140	185	191	175	187	297	301	88	88	234	238	214	244	-9	-9	327	329
13_C10SW_18	132	136	177	177	187	187	-9	-9	88	88	-9	-9	220	230	158	160	327	327
13_C10SW_19	140	140	177	201	187	187	297	297	88	88	230	234	220	222	156	166	327	329
13_C10SW_20	140	140	181	197	187	187	297	297	88	88	238	250	218	220	156	168	327	329
13_C14SW_1	140	140	177	181	187	187	297	299	88	88	226	250	216	222	174	174	327	329
13_C26SW_1	140	140	177	191	187	187	297	297	88	88	220	238	216	216	168	170	327	327
13_C26SW_2	140	140	177	181	187	187	297	299	88	88	230	246	224	228	186	190	327	329
13_C26SW_3	144	144	177	205	165	187	297	297	88	96	242	254	226	226	158	168	-9	-9
13_C26SW_4	140	144	179	203	175	187	297	297	88	88	-9	-9	218	222	160	164	327	327
13_C26SW_6	140	140	185	191	187	187	297	297	88	88	242	242	218	228	164	166	325	327
13_C26SW_8	140	140	177	195	183	187	297	301	88	88	246	246	216	218	162	166	327	327
13_C26SW_9	140	140	181	191	187	187	297	297	88	88	242	242	220	220	-9	-9	327	327
13_C26SW_10	140	140	205	213	183	187	297	297	88	88	242	246	226	226	164	172	327	327
13_C76W_1	140	140	177	191	185	187	297	297	88	88	238	238	212	216	164	172	327	327
13_C76W_2	140	140	185	199	187	187	297	297	88	88	242	250	216	218	162	164	327	327
13_C76W_3	140	140	183	203	187	187	297	297	84	88	240	250	218	220	158	164	325	327
13_C76W_4	140	148	181	195	179	187	297	297	88	88	230	242	218	218	174	190	327	329
13_C76W_5	140	140	185	197	187	187	297	297	88	88	220	230	222	232	152	176	327	327
13_C76W_8	140	140	185	191	187	187	289	293	88	88	242	250	222	222	156	166	327	327
13_C76W_9	140	144	181	181	175	187	297	297	88	88	234	246	218	222	158	158	327	329
13_C76W_10	140	140	183	191	187	187	299	299	88	88	220	238	220	228	176	176	327	327
13_C76W_11	140	140	169	185	187	191	297	299	88	88	234	238	220	240	152	162	327	329
13_C76W_13	140	140	185	205	187	187	295	297	88	88	254	254	216	232	166	166	329	329
13_C76W_14	140	140	191	191	187	187	297	297	88	88	238	262	218	218	168	168	327	329
13_C76W_16	144	144	185	191	187	187	297	297	88	88	238	250	222	230	166	182	-9	-9
13_C76W_17	140	140	191	191	187	187	297	297	84	88	238	254	238	254	162	162	327	329
13_C76W_18	140	140	181	197	187	187	297	299	88	88	212	238	218	220	158	174	327	329
13_C76W_19	140	140	183	193	187	187	299	299	88	88	238	250	216	216	154	154	327	329
13_C76W_20	140	140	173	177	187	187	297	297	88	88	220	220	216	222	158	164	327	327
13_C79W_1	140	140	181	185	179	187	297	297	88	88	254	254	218	226	162	164	327	327
13_C79W_2	140	144	177	181	187	187	297	297	88	88	220	230	216	216	158	176	327	327
13_C79W_3	140	140	185	213	179	187	297	297	88	88	230	234	246	248	148	162	327	327
13_C79W_4	140	140	181	185	187	187	297	299	88	88	242	246	220	226	166	166	327	329
13_C79W_5	140	140	177	185	179	187	297	297	84	84	242	254	232	238	174	182	327	329
13_C79W_6	140	140	181	203	187	187	297	297	88	88	230	230	224	250	160	164	327	327
13_C79W_7	140	140	177	209	187	187	297	297	88	88	-9	-9	220	220	172	174	327	329
13_C79W_8	140	140	185	185	187	187	297	297	88	88	240	250	218	220	162	178	327	329
13_C79W_9	136	140	181	191	187	187	293	297	88	88	234	246	216	216	150	160	329	329
13_C79W_10	140	140	177	181	187	187	297	297	-9	-9	226	254	216	216	158	170	327	327
13_C79W_11	140	144	181	207	187	187	297	299	88	88	246	250	226	226	162	162	327	329
13_C79W_12	140	144	177	191	187	187	297	297	88	96	212	262	216	224	162	164	329	329
13_C79W_13	140	140	173	193	187	187	297	297	84	84	220	240	218	254	176	178	327	329
13_C79W_14	140	140	181	185	179	187	297	297	88	88	-9	-9	216	234	164	170	325	329
13_C79W_15	136	140	191	195	187	187	297	297	88	88	220	242	218	224	158	174	327	327
13_C79W_16	140	140	181	181	187	187	297	297	88	88	-9	-9	214	234	160	170	327	329
13_C79W_17	140	140	189	197	187	187	297	297	88	88	238	240	214	234	160	170	327	329
13_C79W_18	140	140	177	189	187	187	297	297	88	88	220	258	216	218	152	162	327	329
13_C79W_19	140	148	181	181	187	187	297	297	88	88	230	238	224	228	158	166	327	327
13_C79W_20	140	140	181	191	187	187	297	299	88	88	238	258	230	236	164	168	327	329
13_C104W_1	140	144	181	185	187	187	297	297	88	88	242	242	224	248	170	180	325	327
13_C104W_2	140	140	179	191	187	187	297	297	88	88	234	238	214	222	148	156	327	327
13_C104W_3	140	140	181	191	187	187	-9	-9	88	88	236	248	224	246	160	170	327	327
13_C104W_4	132	140	191	221	187	187	-9	-9	88	88	-9	-9	220	250	162	162	327	329
13_C104W_5	136	136	205	205	179	187	-9	-9	88	88	222	222	216	220	160	160	-9	-9
13_C104W_6	140	140	185	189	187	187	297	299	84	88	236	252	218	234	168	186	327	327
13_C104W_7	140	140	185	191	187	187	297	297	88	88	246	254	220	234	164	190	327	327
13_C104W_8	136	140	181	181	175	187	297	297	84	88	-9	-9	224	228	164	164	-9	-9
13_C104W_9	140	140	181	181	187	187	297	297	88	88	246	250	218	222	162	162	327	329
13_C104W_10	136	140	177	201	179	187	297	297	84	88	234	254	212	222	162	162	323	327
13_C119W_2	140	140	181	197	187	187	297	297	88	88	236	238	222	226	158	174	327	327
13_C119W_3	140	140	177	185	187	187	297	297	88	88	248	250	218	218	156	170	327	327
13_C119W_4	140	140	177	177	187	187	297	297	88	88	234	248	216	216	168	168	327	327
13_C119W_5	140	140	177	181	-9	-9	297	299	84	84	258	262	216	222	148	148	323	327
13_C119W_6	140	140	187	199	187	187	297	297	-9	-9	238	242	228	248	148	162	325	329
13_C119W_7	140	140	185	197	187	187	297	297	-9	-9	220	234	216	226	160	164	-9	-9
13_C119W_8	140	140	177	201	179	195	297	297	88	88	230	230	226	226	152	154	329	329
13_C119W_9	140	144	191	205	187	187	297	297	84	88	220	270	216	226	168	168	327	329
13_C119W_10	136	136	177	183	187	187	297	297	88	88	220	240	216	222	164	166	327	329
13_C120W_1	140	140	177	185	179	187	297	297	84	88	246	262	220	232	162	166	327	329
13_C120W_2	140	140	177	181	187	187	299	299	84	88	242	250	214	228	160	166	327	329
13_C120W_3	140	140	183	183	187	187	297	297	88	88	246	246	216	230	154	168	325	327
13_C120W_4	140	140	177	201	187	187	297	297	84	88	246	246	226	252	168	180	327	327
13_C120W_5	140	144	181	181	179	191	297	297	88	88	238	242	220	226	160	180	327	327
13_C120W_8	140	140	181	207	187	195	297	297	88	88	230	234	218	220	156	176	325	327
13_C120W_9	136	140	181	229	187	187	297	297	88	88	240	246	220	224	164	166	327	327
13_C120W_10	140	140	205	205	187	187	297	297	88	88	238	250	216	226	156	162	327	327
13_C120W_11	140	140	181	185	183	187	297	297	84	88	238	242	216	230	158	164	327	329
13_C120W_12	140	144	181	191	187	187	297	297	84	88	220	242	226	226	162	164	327	329
13_C120W_14	132	140	187	229	187	187	297	301	88	88	240	248	-9	-9	162	162	327	329
13_C120W_15	140	140	-9	-9	187	187	297	297	88	88	220	234	218	230	164	166	327	329
13_C120W_16	140	140	181	189	187	187	299	299	88	88	246	258	216	220	162	164	327	329
13_C120W_17	140	144	189	197	175	187	297	299	88	88	246	246	216	222	162	168	327	329
13_C120W_18	132	144	169	177	179	187	297	301	88	88	212	238	220	226	164	168	327	329
13_C120W_19	136	144	191	195	183	187	297	297	84	88	226	240	218	232	160	164	327	327
13_C120W_20	140	140	183	201	179	187	297	297	88	88	238	238	218	232	160	164	327	327
13_C126W_1	140	140	191	205	179	187	297	297	84	88	234	256	216	244	162	162	329	341
13_C126W_2	140	148	183	217	187	187	293	297	88	88	220	250	226	228	160	168	325	329
13_C126W_3	140	140	181	185	187	187	297	297	88	88	242	246	218	254	170	172	327	329
13_C126W_5	140	148	181	195	187	187	297	297	88	88	238	238	214	226	160	170	327	327
13_C126W_6	136	140	177	211	175	187	297	297	88	88	220	250	218	224	162	168	327	327
13_C126W_7	140	140	177	205	187	187	297	297	88	88	242	258	224	238	160	180	327	327
13_C126W_8	140	140	177	189	187	187	297	297	88	88	238	246	212	226	170	172	327	329
13_C126W_10	140	140	177	177	187	187	293	293	84	84	238	246	228	250	166	190	325	329
13_C42N_1	140	140	177	191	187	187	293	293	88	88	236	242	224	254	164	190	325	329
13_C42N_2	140	140	191	205	187	187	293	293	88	88	238	250	216	230	162	164	325	329
13_C42N_4	140	140	181	185	187	187	289	293	88	88	242	246	226	254	166	168	325	325
13_C42N_5	140	140	191	191	187	187	293	293	84	88	242	242	216	216	162	170	329	329
13_C42N_6	140	140	177	181	187	187	293	293	88	88	242	242	218	236	166	166	325	325
13_C42N_7	140	140	177	181	187	187	299	299	88	88	238	238	228	254	164	168	325	329
13_C42N_8	132	140	193	207	179	187	293	293	88	88	242	242	228	254	160	166	329	329
13_C42N_9	140	140	179	181	179	187	293	293	88	88	220	238	220	262	166	172	329	329
13_C42N_10	140	140	181	181	179	187	293	293	88	88	246	250	228	250	158	162	329	331
13_C42N_12	140	140	181	185	187	187	299	299	88	88	238	250	220	238	158	162	329	329
13_C42N_13	140	140	185	191	179	187	293	293	88	88	254	254	218	220	154	154	325	329
13_C42N_14	140	140	177	181	187	187	293	293	88	88	234	242	218	228	158	164	329	329
13_C42N_16	140	140	173	223	187	187	289	293	88	88	234	262	216	226	156	172	329	329
13_C42N_17	140	140	193	205	175	187	299	299	88	88	212	238	230	234	160	166	325	329
13_C42N_18	140	140	191	191	187	187	293	293	84	88	234	262	220	222	148	166	329	329
13_C42N_19	140	140	177	205	187	187	297	297	88	88	230	242	222	248	162	168	329	329
13_C42N_20	132	140	181	191	187	195	293	297	88	88	238	238	224	228	156	166	329	329
13_C42N_21	140	140	177	185	187	187	293	293	84	88	238	246	216	218	160	166	329	329
13_C42N_22	140	140	181	191	187	191	293	293	84	84	234	254	254	254	162	168	325	329
13_C42N_23	140	140	177	177	187	187	293	293	88	88	250	250	222	230	162	170	329	329
13_C42N_24	136	136	181	191	187	187	299	299	84	88	220	242	226	254	162	170	329	329
13_C42N_25	140	140	181	191	179	187	293	293	84	88	228	250	218	228	170	172	329	329
13_C42N_26	140	140	181	209	187	187	289	293	88	88	230	238	216	230	158	168	325	329
13_C42N_27	140	140	177	177	187	187	293	293	88	88	238	238	230	246	164	174	329	329
13_C42N_28	140	140	177	205	175	187	293	293	88	88	236	242	220	228	166	166	325	329
13_C42N_29	140	140	181	185	187	187	293	293	88	88	242	254	222	250	164	168	329	329
13_C42N_30	140	140	191	191	187	187	293	293	88	88	254	266	218	220	164	166	325	329
13_C56N_1	140	140	185	205	183	187	-9	-9	84	88	246	250	222	230	160	162	325	329
13_C56N_2	140	140	-9	-9	179	187	-9	-9	88	88	242	242	216	226	156	194	329	329
13_C56N_3	140	140	181	191	187	187	-9	-9	88	88	240	240	214	254	176	176	325	329
13_C56N_4	140	140	191	207	187	191	-9	-9	84	88	234	258	216	226	156	194	329	329
13_C56N_5	140	140	177	189	187	187	-9	-9	88	88	246	266	220	230	162	180	329	329
13_C56N_6	140	144	185	191	187	187	297	297	-9	-9	238	246	234	246	170	170	329	329
13_C56N_7	140	140	181	181	179	187	-9	-9	84	88	236	236	220	224	164	180	329	329
13_C56N_8	132	140	177	177	187	187	293	293	88	88	242	242	220	230	164	164	329	329
13_C56N_10	140	140	183	183	187	187	-9	-9	84	88	242	242	220	230	142	168	325	329
13_C56N_11	132	140	181	191	187	187	297	297	84	88	228	250	220	244	148	158	329	329
13_C56N_12	136	136	185	191	187	187	293	293	84	88	242	242	218	242	162	162	325	329
13_C56N_13	140	140	185	217	179	187	293	293	84	88	238	238	218	222	160	162	325	329
13_C56N_14	140	140	181	191	187	187	297	297	88	88	242	242	212	228	172	176	329	329
13_C56N_15	140	140	181	181	187	187	-9	-9	88	88	234	234	228	254	154	160	329	329
13_C56N_16	140	140	179	191	187	187	293	293	88	88	242	244	228	254	154	160	329	329
13_C56N_17	140	140	191	203	187	199	293	293	88	88	236	242	218	226	186	186	325	329
13_C56N_19	140	140	169	181	179	187	293	293	88	88	246	246	218	228	162	162	325	329
13_C56N_20	140	140	177	191	187	187	-9	-9	84	84	242	260	218	228	162	162	325	329
13_C56N_21	140	140	181	185	187	187	297	297	88	88	246	254	216	254	158	170	329	333
13_C56N_22	140	140	177	197	187	187	-9	-9	84	84	222	244	240	244	170	172	329	329
13_C56N_23	140	140	177	181	187	187	-9	-9	88	88	-9	-9	216	216	162	170	329	329
13_C56N_24	136	144	177	181	187	187	293	293	84	88	234	240	220	250	162	170	325	325
13_C56N_25	140	140	181	211	187	187	293	293	88	88	250	254	220	250	162	170	329	329
13_C56N_26	140	140	199	205	187	187	293	293	84	88	242	246	218	240	158	158	329	329
13_C56N_27	140	140	177	199	187	187	-9	-9	88	88	228	248	218	240	158	158	329	329
13_C56N_28	140	140	177	191	175	187	293	293	88	88	234	234	226	230	156	180	329	329
13_C56N_29	140	140	191	195	187	187	293	293	88	88	234	236	220	220	158	170	329	329
13_C109N_1	136	140	177	183	187	199	293	293	84	88	242	270	220	228	162	162	329	329
13_C109N_2	140	140	181	191	187	195	293	293	88	88	234	242	252	254	152	152	325	329
13_C109N_3	140	140	177	201	187	187	-9	-9	88	88	242	250	226	244	164	166	325	325
13_C109N_4	140	140	177	211	187	187	-9	-9	84	88	238	246	232	240	158	158	325	329
13_C109N_6	136	140	197	217	187	187	297	297	88	88	-9	-9	226	254	158	174	329	329
13_C109N_8	140	140	181	205	187	187	-9	-9	84	88	212	242	224	242	158	162	329	329
13_C109N_9	140	140	173	177	187	187	299	299	84	88	-9	-9	220	228	166	166	329	329
13_C109N_10	132	140	185	191	187	187	299	299	88	88	238	242	216	220	160	162	329	333
13_C109N_11	140	140	165	181	179	187	293	293	88	88	246	262	216	228	162	180	329	329
13_C109N_12	136	140	177	191	187	195	293	293	88	88	234	250	220	224	164	164	325	329
13_C109N_13	140	148	177	193	187	187	-9	-9	88	88	-9	-9	220	222	162	162	329	329
13_C109N_14	140	140	185	205	175	187	293	297	88	88	238	238	220	230	162	168	325	329
13_C109N_15	140	140	181	205	187	199	-9	-9	84	88	238	238	220	254	160	164	325	329
13_C109N_16	140	140	169	177	187	195	-9	-9	84	88	246	258	216	216	160	168	-9	-9
13_C109N_17	136	136	187	193	187	199	-9	-9	84	88	-9	-9	216	216	160	168	329	329
13_C109N_18	140	140	181	181	187	187	-9	-9	84	88	238	242	230	256	160	170	325	329
13_C109N_19	136	144	185	191	187	187	-9	-9	84	88	220	238	214	218	150	176	329	329
13_C109N_20	140	140	191	191	187	187	-9	-9	84	84	236	266	222	244	144	146	321	329
13_C109N_21	140	140	181	181	187	187	293	293	88	88	230	234	226	252	156	164	329	329
13_C109N_22	140	140	137	185	187	199	297	297	88	88	234	246	218	222	164	190	329	329
13_C109N_23	140	140	185	205	187	187	299	299	88	88	242	242	214	220	176	186	329	329
13_C109N_25	136	140	179	199	179	187	-9	-9	84	88	-9	-9	220	228	164	170	325	329
13_C109N_26	140	140	177	191	179	187	-9	-9	88	88	240	258	220	228	164	170	325	329
13_C109N_27	140	140	185	225	181	187	297	297	84	88	238	254	218	254	162	180	325	329
13_C109N_28	140	140	177	203	179	195	293	297	84	88	242	254	220	230	160	168	329	329
13_C109N_29	140	144	181	185	179	187	297	297	84	88	-9	-9	222	232	158	160	329	329
13_C109N_30	140	140	181	191	187	187	293	299	88	88	236	242	216	216	-9	-9	323	323
13_C171N_2	140	140	181	191	187	187	293	293	84	88	240	250	226	232	162	178	329	329
13_C171N_3	136	136	191	197	187	187	299	299	88	88	238	246	220	254	162	170	329	329
13_C171N_4	140	160	181	193	187	195	293	297	88	96	246	270	220	224	160	162	329	329
13_C171N_6	140	140	189	189	187	187	293	293	88	88	254	258	244	254	168	176	325	329
13_C171N_7	140	140	181	205	187	215	293	299	84	88	242	242	234	236	156	180	325	329
13_C171N_8	140	140	177	199	187	187	297	297	88	88	234	246	218	250	154	156	329	329
13_C171N_9	140	140	177	191	187	187	293	293	84	88	234	254	220	220	168	170	329	329
13_C171N_10	140	140	185	191	187	195	297	297	88	88	-9	-9	216	228	150	158	325	329
13_C171N_11	140	140	205	205	187	187	293	293	88	88	230	234	218	220	166	168	329	329
13_C171N_12	132	144	181	191	187	187	295	295	88	88	250	250	228	232	152	162	329	329
13_C171N_13	140	140	181	181	187	187	293	293	88	88	238	242	216	216	158	162	321	329
13_C171N_14	140	140	177	181	187	187	293	293	88	88	250	254	218	220	160	178	329	329
13_C171N_15	140	140	181	191	187	191	297	297	88	88	242	246	216	218	168	168	325	329
13_C171N_16	140	140	177	197	187	187	293	293	88	88	242	246	222	228	158	162	329	329
13_C171N_17	140	140	177	209	179	187	297	297	88	88	230	238	226	250	158	166	325	329
13_C171N_18	140	140	183	183	187	187	293	293	88	88	244	246	216	220	162	170	325	329
13_C171N_19	140	140	191	191	187	187	293	295	84	84	242	246	216	216	166	168	-9	-9
13_C171N_20	140	140	185	211	187	187	-9	-9	84	88	242	246	220	226	164	164	329	329
13_C171N_27	140	140	169	181	187	187	293	293	84	88	230	250	220	224	158	162	329	329
13_C171N_28	140	140	177	177	175	187	-9	-9	84	88	226	242	220	224	162	162	329	329
13_C178N_1	132	140	177	177	179	187	293	293	84	88	238	238	220	222	158	162	325	329
13_C178N_2	140	140	175	179	187	187	293	293	88	88	226	238	228	230	158	170	325	329
13_C178N_3	140	140	181	181	187	187	293	293	88	88	238	246	218	226	160	162	329	329
13_C178N_5	140	144	177	213	179	187	-9	-9	88	88	242	250	220	226	156	168	329	329
13_C178N_6	144	144	179	191	187	199	293	293	88	88	236	242	222	224	168	174	325	329
13_C178N_7	140	140	177	177	187	191	299	299	88	88	230	244	228	254	162	172	325	329
13_C178N_8	140	140	181	191	187	187	299	299	88	88	238	246	220	224	164	170	325	329
13_C178N_10	140	140	169	191	187	187	289	293	88	88	240	246	218	228	156	176	329	329
13_C178N_11	136	140	183	183	187	187	293	297	88	88	238	242	220	220	160	168	329	329
13_C178N_12	140	140	177	181	187	187	289	293	84	88	242	252	216	248	178	190	329	329
13_C178N_13	132	132	191	205	187	187	293	293	88	88	244	248	220	220	156	170	329	329
13_C178N_14	140	140	177	191	179	187	293	293	84	88	238	254	222	224	158	166	329	329
13_C178N_15	140	140	169	207	187	187	289	293	84	88	220	248	218	224	152	158	329	329
13_C178N_16	140	140	181	221	187	187	299	299	84	88	234	238	226	254	164	166	325	329
13_C178N_17	140	140	177	205	187	187	293	293	84	84	246	250	218	220	160	168	325	329
13_C178N_18	140	140	181	213	187	191	289	293	84	88	242	262	226	228	152	156	329	329
13_C178N_19	132	140	177	181	179	187	293	297	88	88	234	240	220	228	158	168	329	329
13_C178N_20	140	140	181	191	187	187	293	293	84	88	234	242	216	220	152	166	325	325
13_C178N_21	140	140	177	191	183	187	293	293	88	88	242	258	220	226	160	164	325	329
13_C178N_22	140	140	181	201	187	187	293	293	84	88	226	230	214	224	162	174	325	329
13_C178N_23	140	140	181	181	179	187	293	293	84	88	234	246	220	230	162	178	329	329
13_C178N_24	140	140	205	205	175	191	293	293	84	88	242	246	222	224	162	182	325	329
13_C178N_25	136	140	185	195	187	187	293	293	88	88	250	250	216	230	160	170	325	325
13_C178N_26	140	140	185	217	187	187	293	293	88	88	242	250	216	216	164	166	325	325
13_C178N_27	140	140	185	191	187	191	299	299	84	88	246	246	212	218	160	162	325	329
13_C178N_28	140	144	181	191	187	187	293	293	84	88	242	250	218	222	166	166	325	325
13_C178N_29	140	144	181	185	179	187	-9	-9	88	88	234	250	226	254	154	162	329	329
13_C178N_30	140	140	185	191	187	195	297	297	84	88	226	262	216	226	156	158	329	329
13_P42N_14C	140	144	-9	-9	187	187	-9	-9	88	88	242	254	216	218	164	164	325	341
13_P42N_16C	140	140	181	205	187	187	293	293	80	88	238	250	226	230	156	158	329	329
12_P6SW_1	136	148	173	201	187	187	297	301	88	88	246	264	220	224	152	160	341	341
12_P6SW_2	136	140	177	185	187	187	293	295	88	88	204	236	216	226	148	158	341	341
12_P6SW_3	136	140	185	193	175	187	293	297	88	88	224	252	228	240	162	166	339	341
12_P6SW_4	140	152	189	217	187	187	-9	-9	88	88	230	250	218	222	152	152	-9	-9
12_P6SW_5	140	144	197	213	187	187	297	297	88	88	232	232	220	234	152	152	341	343
12_P6SW_7	140	144	185	189	187	191	-9	-9	88	88	240	256	224	226	162	162	341	341
12_P6SW_9	140	156	189	197	187	187	297	297	88	88	258	266	218	224	162	162	341	341
12_P6SW_10	132	144	189	189	185	187	297	297	80	88	252	264	222	226	160	160	341	343
12_P6SW_11	140	144	189	189	175	187	297	297	80	88	226	226	226	234	160	160	341	341
12_P6SW_15	144	148	173	173	187	187	297	297	88	88	258	258	218	224	158	158	341	341
12_P6SW_16	136	140	193	197	175	187	-9	-9	88	88	232	232	222	222	150	152	339	341
12_P15SW_2	128	156	193	197	179	187	293	293	88	88	248	248	222	230	154	164	339	341
12_P15SW_3	140	148	177	189	187	187	289	297	88	88	246	252	226	250	148	164	341	341
12_P15SW_4	140	140	181	197	175	187	293	305	88	88	220	236	228	232	146	160	341	343
12_P15SW_5	140	144	185	193	187	187	293	297	88	88	248	272	226	230	152	174	339	341
12_P15SW_6	128	140	193	201	179	187	293	305	80	88	244	260	228	236	158	158	341	341
12_P15SW_7	132	144	185	193	183	187	293	297	80	88	236	264	-9	-9	152	158	-9	-9
12_P15SW_8	136	140	189	197	187	187	297	297	88	88	264	276	218	222	156	162	-9	-9
12_P15SW_10	136	140	181	185	187	187	297	297	88	88	246	280	224	232	160	164	341	341
12_P15SW_31	140	144	189	197	175	187	293	297	80	88	244	268	220	238	160	168	341	341
12_P15SW_32	136	140	181	205	179	187	297	301	88	88	272	280	222	226	158	166	341	341
12_P15SW_33	136	144	177	237	187	187	297	301	80	88	256	260	224	254	160	164	341	341
12_P15SW_34	140	144	185	193	187	187	293	297	80	88	222	268	224	248	152	168	341	341
12_P15SW_35	140	144	189	193	187	187	297	297	88	88	252	294	220	226	150	150	335	339
12_P15SW_36	140	160	193	197	187	187	297	297	80	88	250	260	228	236	150	160	341	341
12_P16SW_12	140	152	173	185	187	199	289	297	88	88	252	260	216	224	152	152	341	341
12_P16SW_14	148	156	189	197	179	187	297	297	80	88	248	252	230	296	160	160	341	341
12_P16SW_16	136	144	189	209	179	187	297	297	80	88	236	250	-9	-9	152	152	337	337
12_P16SW_18	140	148	197	201	187	191	297	297	88	88	-9	-9	220	222	156	158	341	343
12_P16SW_19	140	152	181	185	187	187	297	301	88	88	220	260	220	264	162	178	341	341
12_P16SW_471	140	148	177	193	187	187	297	301	88	96	236	246	220	232	148	164	341	341
12_P16SW_474	140	144	185	189	175	187	293	305	88	88	220	236	218	226	156	164	341	341
12_P16SW_477	140	140	185	189	187	195	293	297	88	88	248	248	224	248	146	162	339	341
12_P16SW_479	140	140	177	197	187	187	297	305	80	88	220	264	224	228	154	160	341	341
12_P16SW_480	140	140	177	197	179	191	281	301	84	88	244	264	218	222	162	182	339	341
12_P16SW_481	140	144	189	197	179	187	297	301	88	88	224	248	246	250	152	156	341	341
12_P16SW_483	132	140	185	189	187	187	293	301	88	88	242	248	228	230	154	164	339	341
12_P16SW_489	144	144	185	189	187	195	293	297	88	96	244	264	218	222	160	162	341	341
12_P25aSW_1	140	140	193	193	187	187	297	299	80	88	264	264	216	226	160	168	341	341
12_P25aSW_2	140	140	177	189	175	187	297	305	80	88	260	268	220	224	154	160	339	341
12_P25aSW_3	144	164	181	181	175	187	293	295	88	88	256	260	226	240	152	162	341	341
12_P25aSW_4	140	144	189	193	187	187	289	305	88	88	260	284	218	228	154	164	341	345
12_P25aSW_6	140	148	193	197	179	187	-9	-9	88	88	234	244	246	284	158	164	341	341
12_P25aSW_7	140	140	181	189	187	187	281	297	80	88	226	262	226	226	158	172	341	341
12_P25aSW_8	136	144	185	189	187	187	301	321	80	88	252	260	220	226	140	152	339	345
12_P25aSW_10	140	160	185	201	187	187	297	297	88	96	232	260	218	220	154	168	341	341
12_P8S_73	144	144	181	181	187	191	293	293	80	88	-9	-9	216	216	160	162	339	341
12_P8S_74	140	148	-9	-9	187	187	-9	-9	88	88	232	232	224	228	152	164	341	341
12_P8S_75	140	144	189	197	185	187	293	297	80	88	230	256	222	228	152	152	341	343
12_P8S_76	140	144	195	195	187	187	297	297	80	80	-9	-9	222	232	154	160	341	341
12_P8S_78	144	152	177	177	187	187	297	305	88	88	248	248	244	244	152	158	333	341
12_P8S_79	140	148	183	189	187	187	297	305	88	88	-9	-9	226	230	160	162	-9	-9
12_P8S_80	140	152	173	189	179	187	297	305	80	88	244	268	220	224	152	160	341	341
12_P8S_81	140	148	181	189	187	187	297	305	88	88	232	232	246	268	156	166	339	341
12_P8S_82	140	144	181	193	171	187	297	301	80	88	232	254	222	224	152	172	339	341
12_P8S_83	140	140	185	205	187	187	289	297	80	88	232	252	222	248	156	166	341	341
12_P8S_84	140	144	173	189	187	187	293	297	88	88	232	258	220	226	152	158	341	341
12_P8S_85	140	140	193	193	187	191	297	305	88	88	252	264	220	224	158	160	-9	-9
12_P8S_86	140	140	181	181	187	191	297	297	80	88	-9	-9	224	226	156	158	341	341
12_P8S_87	144	148	173	197	183	191	297	297	88	88	244	256	232	238	152	158	339	341
12_P8S_88	144	148	185	189	187	187	297	297	88	88	248	264	222	224	162	164	337	339
12_P8S_89	136	144	185	185	185	187	269	297	88	88	256	260	226	228	-9	-9	343	343
12_P8S_90	140	144	165	193	179	187	269	297	80	88	244	256	220	222	156	166	339	341
12_P8S_91	140	140	177	181	175	187	297	301	88	88	248	264	224	226	154	164	341	341
12_C192N_10P	140	144	181	189	187	187	297	297	80	88	244	260	216	240	156	160	341	341
12_C4N_16P	144	152	193	193	187	191	297	297	88	88	254	260	222	224	154	160	341	343
12_C4N_29P	136	144	173	185	187	187	297	297	88	88	246	272	228	228	152	158	341	341
12_C2SW_53P	140	140	193	201	187	187	289	305	88	88	236	256	222	222	154	160	341	341
12_C2SW_54P	140	144	189	189	179	187	297	297	88	88	240	264	220	220	156	162	341	343
12_C2SW_55P	140	168	181	221	187	209	297	305	88	88	248	248	220	224	152	168	341	341
12_C2SW_57P	132	148	185	189	175	187	281	305	88	88	248	264	230	232	152	156	339	341
12_C9S_18P	152	160	185	197	187	187	293	301	80	88	244	256	222	266	154	164	341	341
12_C9S_19SP	136	144	189	197	187	187	301	309	88	88	284	284	222	222	156	156	341	341
12_P56W_1	144	156	181	185	187	187	289	293	88	88	252	272	216	222	158	164	341	341
12_P56W_4	144	156	181	189	187	187	293	297	88	88	236	260	222	236	156	162	341	345
12_P56W_5	148	152	181	185	187	187	297	297	80	80	240	240	222	230	156	158	341	341
12_P56W_6	140	140	181	189	187	187	289	293	88	88	228	276	220	236	158	164	341	341
12_P56W_8	140	152	189	193	175	187	293	297	88	88	236	264	220	222	158	158	341	345
12_P56W_9	140	144	185	193	187	187	297	301	80	84	256	280	220	222	156	170	341	341
12_P57W_3	140	164	189	193	187	187	297	297	88	88	256	256	220	224	152	164	341	343
12_P57W_4	136	136	189	205	185	187	309	309	88	88	232	284	222	230	158	158	341	341
12_P57W_5	140	140	181	221	179	187	289	297	88	88	196	272	222	232	158	162	341	341
12_P57W_6	152	160	185	213	175	187	297	305	88	88	240	264	232	254	156	160	341	341
12_P57W_7	140	148	177	189	187	195	297	297	80	80	254	256	224	232	160	160	341	341
12_P57W_8	140	144	193	205	191	195	297	305	88	88	252	264	228	228	158	160	341	341
12_P57W_9	144	148	185	185	175	187	289	297	88	88	256	264	228	258	160	164	341	341
12_P57W_10	144	144	173	189	175	187	297	297	80	88	228	272	224	224	154	158	341	341
12_P61W_1	136	144	189	193	175	187	293	301	88	88	232	260	228	228	156	158	341	341
12_P61W_3	140	144	177	185	179	187	289	297	80	88	240	268	222	242	162	162	341	341
12_P61W_4	144	152	173	197	179	187	297	309	88	88	196	272	218	236	152	164	341	341
12_P61W_7	148	148	185	193	187	187	293	293	88	88	240	252	216	228	150	170	341	341
12_P61W_8	140	148	185	185	183	187	293	297	88	88	248	256	218	226	156	162	341	341
12_P64W_11	136	144	197	201	187	187	297	325	80	88	-9	-9	220	224	154	160	-9	-9
12_P64W_13	144	152	181	193	179	187	297	297	88	96	220	220	222	238	160	162	339	341
12_P64W_14	144	152	193	193	179	187	289	297	84	88	264	268	222	228	152	164	341	341
12_P64W_15	136	144	177	225	179	187	297	301	88	88	216	224	220	224	150	158	341	341
12_P64W_18	136	140	193	193	179	187	293	301	80	88	232	248	220	224	156	158	341	341
12_P64W_19	140	152	173	189	187	199	297	297	88	88	264	268	222	270	152	158	341	343
12_P64W_20	140	148	197	201	187	199	305	305	80	80	268	272	222	228	158	168	337	341
12_P114W_1	140	144	173	189	187	187	297	297	80	80	232	248	270	272	160	170	337	341
12_P114W_2	140	144	197	205	175	191	293	297	88	88	256	280	228	244	160	160	341	341
12_P114W_3	140	140	197	197	179	187	295	305	80	88	216	240	222	224	158	158	341	341
12_P114W_6	140	140	185	231	187	187	297	297	88	88	252	260	220	226	162	164	341	341
12_P114W_7	132	144	181	185	175	187	281	301	88	88	228	264	224	284	160	164	341	343
12_P114W_9	152	164	177	189	167	175	297	321	88	88	260	280	226	284	158	164	341	343
12_P114W_10	140	144	169	197	187	187	297	297	88	88	228	250	214	226	-9	-9	341	341
12_P115W_1	140	140	193	193	187	187	293	297	88	88	232	264	214	226	152	152	341	341
12_P115W_2	140	144	181	213	175	187	297	309	80	88	248	264	250	258	152	152	339	343
12_P115W_6	136	144	177	193	187	187	297	301	88	88	224	240	214	228	154	164	335	341
12_P115W_7	144	152	181	185	179	183	289	293	84	88	248	288	218	222	152	164	335	341
12_P115W_8	140	140	193	213	187	187	289	297	88	88	240	276	222	228	152	160	341	341
12_P115W_9	148	148	189	193	187	187	293	293	80	88	256	272	224	228	158	160	341	343
12_P115W_10	132	140	181	197	175	179	297	321	84	88	252	268	220	222	162	170	339	341
12_P25N_1	148	148	189	189	179	181	297	305	80	80	242	248	226	244	158	162	341	341
12_P25N_2	144	144	197	213	187	187	297	307	88	88	196	240	222	240	154	160	341	343
12_P25N_3	140	148	181	201	187	187	-9	-9	88	88	200	232	226	226	152	162	341	343
12_P25N_4	140	144	185	185	187	187	297	297	80	88	260	272	228	236	152	166	341	341
12_P25N_5	136	136	189	189	187	191	297	297	88	88	228	232	224	228	152	160	341	341
12_P25N_6	140	148	189	197	183	187	293	293	88	88	254	288	228	230	162	164	339	341
12_P25N_7	140	148	189	197	183	187	293	293	88	88	254	288	228	230	162	164	339	341
12_P25N_8	132	144	193	193	187	187	-9	-9	88	88	204	204	220	224	152	156	339	341
12_P25N_10	132	140	185	197	183	187	297	297	88	88	244	256	214	222	156	170	339	341
12_P25N_11	140	140	173	177	175	187	295	301	88	88	248	248	222	222	158	158	341	341
12_P25N_12	140	140	181	201	187	187	297	297	80	88	240	248	222	230	156	160	341	341
12_P25N_13	140	140	185	189	187	187	293	297	88	88	256	264	244	258	160	168	341	341
12_P25N_14	136	140	193	229	179	187	297	297	88	88	240	240	222	224	154	156	341	341
12_P25N_15	140	140	177	177	187	187	281	297	80	88	246	268	216	238	152	152	341	341
12_P25N_16	140	140	189	197	187	187	293	297	88	88	252	272	224	230	160	162	341	343
12_P25N_20	140	144	181	193	187	187	289	297	88	88	250	268	228	232	156	158	341	341
12_P25N_21	140	140	173	181	183	187	297	309	88	88	248	272	220	220	154	160	341	341
12_P25N_22	140	144	189	197	187	187	297	321	88	88	244	250	226	226	164	170	341	341
12_P25N_23	136	144	189	197	183	187	293	305	80	80	236	240	220	228	160	174	329	329
12_P25N_24	136	140	181	197	187	187	309	313	80	88	260	260	218	230	170	176	329	329
12_P25N_26	136	152	185	221	187	187	297	305	80	88	244	264	222	224	162	164	341	341
12_P25N_27	140	152	181	193	179	187	297	301	88	88	236	244	224	232	156	164	341	341
12_P25N_28	140	140	189	193	187	187	297	297	88	88	272	272	228	232	156	158	341	341
12_P25N_29	136	148	185	185	187	187	297	301	88	88	196	288	220	220	154	160	341	341
12_P25N_30	140	160	193	197	187	187	293	297	88	92	224	254	226	226	164	170	341	341
12_P79N_1	140	140	189	189	175	187	297	297	80	88	252	260	222	224	156	158	339	341
12_P79N_2	144	152	177	189	175	187	295	297	80	80	216	252	218	244	152	160	339	341
12_P79N_3	144	152	197	201	183	187	289	297	80	88	232	248	224	228	160	166	339	341
12_P79N_4	140	144	181	189	187	195	301	325	88	88	234	254	222	228	162	180	341	341
12_P79N_5	140	148	181	181	187	187	297	297	80	88	222	260	222	228	158	164	341	341
12_P79N_6	116	140	181	193	187	187	297	301	80	88	256	260	224	244	158	162	341	341
12_P79N_7	148	148	185	189	187	187	293	297	88	88	244	252	222	226	156	160	341	341
12_P79N_8	148	148	185	189	187	187	317	331	80	88	268	280	220	230	158	162	341	341
12_P79N_9	140	144	185	189	187	187	297	297	88	88	242	252	218	222	158	160	339	341
12_P79N_11	140	144	189	193	187	187	297	301	88	88	246	268	224	224	152	162	341	341
12_P79N_12	136	144	177	205	183	187	289	301	88	88	220	220	226	242	158	160	341	341
12_P79N_13	136	140	185	193	187	187	297	297	88	88	240	244	222	232	158	172	335	341
12_P79N_14	140	144	181	189	175	187	297	297	88	88	226	244	222	224	156	158	341	341
12_P79N_15	144	144	181	189	179	187	301	301	88	88	230	264	220	220	162	164	341	341
12_P79N_16	144	172	189	201	175	187	301	305	88	88	252	252	222	238	152	166	341	341
12_P79N_17	140	140	181	193	187	187	297	299	88	88	248	276	224	230	158	160	337	341
12_P79N_18	140	148	193	197	187	187	289	293	88	88	204	204	232	242	164	164	341	341
12_P79N_19	140	144	173	189	179	187	297	297	88	88	196	252	224	224	156	156	341	343
12_P79N_20	136	140	185	189	179	187	293	301	88	88	244	244	220	222	156	164	341	341
12_P79N_21	136	152	177	193	187	187	297	301	88	88	246	260	222	254	158	158	341	341
12_P79N_22	144	164	185	197	187	187	289	297	88	96	256	256	216	216	164	164	341	341
12_P79N_23	140	140	189	197	179	183	293	297	88	88	212	244	222	224	158	160	341	341
12_P79N_24	140	164	165	189	175	179	297	297	88	88	232	264	210	220	156	164	341	341
12_P79N_25	140	144	173	197	187	187	295	297	80	88	246	256	214	224	156	162	341	343
12_P79N_26	140	140	177	189	187	187	293	309	80	80	248	248	220	232	162	162	341	341
12_P79N_27	140	156	185	197	185	187	293	297	88	88	264	276	232	252	142	156	341	341
12_P79N_28	144	160	185	193	187	187	297	297	88	88	262	266	222	234	156	192	341	341
12_P79N_29	136	144	197	205	175	187	297	297	88	88	272	272	218	250	154	156	341	341
12_P79N_30	140	140	197	201	187	187	309	309	88	88	260	266	228	244	152	158	337	341
12_P191N_3	140	144	181	189	179	199	297	305	80	88	212	244	216	226	158	160	341	341
12_P191N_4	136	144	189	189	187	187	297	297	80	80	246	246	220	220	150	162	341	345
12_P191N_5	140	148	177	185	183	187	301	305	80	88	246	260	220	220	152	156	337	341
12_P191N_6	140	160	177	205	187	187	297	297	88	88	260	272	228	234	160	164	341	341
12_P191N_11	144	144	185	189	175	187	297	297	88	88	228	272	220	228	152	162	341	341
12_P191N_12	140	144	185	193	175	179	297	309	88	88	226	244	220	232	152	164	339	341
12_P191N_14	140	148	193	193	179	195	297	301	80	80	268	292	238	238	158	160	341	341
12_P191N_15	144	144	181	181	187	187	297	297	88	88	236	246	226	236	158	178	341	341
12_P191N_17	140	140	189	189	187	195	293	297	84	88	204	246	218	222	164	172	341	343
12_P191N_19	140	148	193	201	183	191	297	301	88	88	232	252	232	244	162	164	341	341
12_P191N_20	140	140	181	185	187	187	297	301	88	88	260	270	238	242	152	162	341	341
12_P191N_21	140	140	173	201	187	187	297	301	88	96	260	272	220	228	158	172	341	341
12_P191N_22	140	152	185	189	179	187	297	301	88	88	262	268	220	224	154	160	341	341
12_P191N_23	136	140	177	189	179	187	281	297	88	88	260	264	222	224	152	162	-9	-9
12_P191N_26	140	144	181	189	179	187	297	297	88	88	248	264	222	256	158	158	339	341
12_P191N_27	144	148	189	189	191	195	297	297	88	88	258	264	222	234	152	154	341	341
12_P191N_28	140	144	185	189	175	187	297	297	80	88	246	256	214	242	160	162	341	343
12_P191N_29	148	160	185	189	187	187	293	301	88	88	252	268	222	230	154	156	339	341
12_P205N_2	140	140	185	197	187	187	297	313	88	88	248	252	222	226	162	170	341	343
12_P205N_3	140	140	185	197	187	187	297	297	88	88	240	252	218	228	150	162	341	341
12_P205N_5	140	140	181	197	187	187	297	301	80	88	248	268	226	248	154	158	341	341
12_P205N_6	140	152	177	201	187	187	293	317	88	88	236	242	228	246	156	162	341	341
12_P205N_7	136	140	173	193	179	203	297	297	80	88	248	256	222	226	152	156	341	341
12_P205N_8	136	140	189	197	187	187	297	301	88	88	256	256	224	228	168	170	341	343
12_P205N_9	140	144	189	189	187	187	297	301	88	88	262	270	220	222	156	160	341	341
12_P205N_11	140	148	185	205	187	187	297	297	88	88	252	260	222	222	154	162	341	341
12_P205N_13	140	168	181	181	179	187	289	297	80	80	236	252	240	244	150	154	345	345
12_P205N_14	140	148	181	185	187	191	297	301	88	88	260	260	216	224	164	168	341	341
12_P205N_15	144	164	173	201	175	187	297	313	80	88	260	268	224	242	154	160	341	341
12_P205N_16	144	144	185	185	187	187	293	297	80	88	248	254	222	224	152	162	341	341
12_P205N_17	144	144	193	197	175	187	297	297	88	88	244	260	224	224	158	172	341	341
12_P205N_18	140	140	185	189	187	195	297	297	88	88	244	244	220	222	154	168	341	341
12_P205N_19	128	156	185	193	195	199	289	297	88	88	252	252	216	224	160	162	339	341
12_P205N_21	132	144	189	209	187	191	297	297	80	88	264	268	228	256	154	162	339	341
12_P205N_22	144	148	185	197	175	187	297	297	80	88	228	246	228	238	156	160	341	341
12_P205N_23	136	152	173	189	179	187	297	297	88	88	252	264	228	232	158	162	341	341
12_P205N_24	140	144	189	197	175	187	293	297	80	88	242	244	228	228	152	158	339	341
12_P205N_25	140	140	185	189	187	195	297	297	88	88	260	272	216	222	152	168	341	341
12_P205N_26	144	148	181	185	187	187	295	297	80	88	220	256	222	226	164	172	341	341
12_P205N_27	140	140	189	197	187	187	289	297	88	88	256	264	238	248	160	160	341	343
12_P205N_28	144	144	177	185	179	187	297	297	88	88	240	252	222	238	154	156	341	341
12_P205N_29	136	148	177	189	187	187	297	297	80	88	260	260	246	246	154	162	341	341
12_P205N_30	132	132	185	189	187	191	297	301	88	88	248	268	224	224	152	196	341	341
12_P205N_31	152	160	189	189	187	191	293	297	88	96	230	230	226	228	160	172	341	341
12_P211N_1	140	144	173	177	187	187	297	297	80	92	266	272	212	228	146	166	341	343
12_P211N_2	144	148	185	189	187	191	297	297	80	88	244	244	226	228	156	158	343	343
12_P211N_3	144	144	173	181	183	187	297	301	80	88	264	272	220	222	152	154	339	341
12_P211N_4	144	160	189	193	187	187	297	297	88	88	248	284	224	226	160	164	341	343
12_P211N_5	140	148	193	193	187	187	297	297	88	88	232	252	222	222	166	176	341	341
12_P211N_6	144	144	189	193	183	187	295	297	88	88	236	240	224	266	160	162	341	341
12_P211N_8	136	140	185	209	187	187	293	297	88	88	212	226	222	222	158	162	341	341
12_P211N_9	132	160	189	197	175	179	293	297	88	88	196	240	214	216	150	156	341	341
12_P211N_10	140	144	169	185	187	187	281	293	88	96	228	260	222	248	160	164	339	341
12_P211N_11	136	136	185	197	187	187	297	305	80	88	244	256	218	224	162	162	337	341
12_P211N_12	136	156	181	189	187	187	297	313	88	88	268	268	220	222	158	164	341	341
12_P211N_13	140	140	177	189	187	193	297	297	88	88	264	264	224	226	156	168	341	341
12_P211N_17	144	156	185	189	175	179	297	301	88	88	272	292	220	222	152	164	341	343
12_P211N_18	140	140	189	205	187	187	297	297	88	88	252	256	222	262	154	160	341	341
12_P211N_19	136	140	181	185	175	187	289	297	88	88	256	262	224	238	154	158	341	341
12_P211N_20	144	152	173	193	187	187	293	297	88	88	260	260	222	224	156	160	339	341
12_P211N_21	140	140	185	193	175	187	297	317	88	88	254	254	224	224	150	158	341	341
13_P4S_201	136	136	193	193	187	187	297	297	88	88	246	252	224	224	152	154	341	341
13_P4S_203	140	140	193	205	187	187	293	297	88	88	248	256	226	232	158	164	339	341
13_P4S_205	140	144	179	189	175	187	297	309	84	88	224	246	218	240	156	162	341	341
13_P4S_206	140	144	181	185	175	187	297	297	84	88	224	246	222	266	160	162	341	341
13_P22S_296	140	144	181	189	187	191	301	309	80	88	256	268	220	240	154	154	341	341
13_P22S_297	148	152	189	189	183	187	281	297	80	88	240	256	220	222	152	152	339	341
13_P22S_298	168	168	185	197	187	187	-9	-9	80	88	252	268	222	228	158	166	333	343
13_P22S_299	140	148	181	189	181	187	293	297	88	88	228	236	220	228	158	162	341	341
13_P22S_300	140	148	185	189	187	187	297	297	80	88	264	276	220	234	158	162	339	341
13_P22S_301	144	148	185	185	175	179	297	297	88	88	236	256	222	224	156	160	335	341
13_P22S_302	140	140	189	189	185	187	297	313	80	88	228	252	214	250	148	148	341	341
13_P22S_303	132	144	185	193	187	187	297	297	80	88	252	288	222	222	156	158	341	341
13_P22S_304	140	152	177	197	179	187	297	297	80	88	240	252	244	262	166	166	341	341
13_P22S_305	140	148	185	193	179	199	297	297	88	88	240	248	220	226	156	158	341	341
13_P22S_306	140	144	205	205	187	187	297	297	88	88	232	260	220	226	158	160	341	341
13_P22S_307	140	144	185	201	187	187	293	297	88	88	236	284	224	224	152	158	341	341
13_P22S_308	144	156	173	185	175	187	293	297	88	88	200	260	224	248	152	160	341	341
13_P22S_309	140	148	185	197	187	187	293	297	88	88	244	254	234	244	160	174	339	341
13_P22S_310	140	144	185	197	175	187	293	293	80	88	256	264	228	247	158	164	341	343
13_P22S_311	144	144	197	209	179	191	295	297	88	88	254	272	224	228	156	164	341	343
13_P22S_312	132	140	189	189	187	187	305	337	80	88	252	268	220	232	150	170	341	341
13_P22S_313	144	156	185	193	187	187	293	297	88	88	252	264	226	238	162	164	339	341
13_P22S_314	136	140	177	201	179	187	297	301	80	88	204	264	222	226	156	158	341	341
13_P22S_315	140	144	177	193	187	187	297	309	88	88	228	252	222	224	160	180	341	341
13_P27S_231	144	148	193	201	187	187	297	297	88	88	-9	-9	220	224	160	188	341	341
13_P27S_232	140	144	181	185	175	179	297	301	80	88	240	268	220	250	158	166	341	341
13_P27S_233	140	152	181	185	187	187	297	297	80	88	248	264	228	240	152	158	341	341
13_P27S_234	140	140	189	201	187	191	297	305	80	88	256	264	220	264	158	160	339	341
13_P27S_235	136	140	181	189	175	187	293	309	88	88	248	268	224	228	156	174	341	341
13_P27S_236	136	144	193	201	187	195	297	297	88	88	230	230	228	232	152	158	341	341
13_P27S_237	140	144	197	197	187	187	297	297	88	88	252	262	228	242	158	168	339	341
13_P27S_238	136	144	185	189	187	187	297	305	80	88	264	264	220	294	152	164	339	341
13_P27S_239	140	144	181	189	187	187	297	301	88	88	250	264	226	226	170	170	341	341
13_P27S_240	140	148	193	193	187	187	293	297	80	88	240	252	224	228	160	164	341	341
13_P27S_241	140	148	201	213	187	187	297	313	88	88	246	264	220	222	156	160	341	341
13_P27S_242	136	148	173	197	171	187	297	301	88	88	228	272	232	252	152	156	339	341
13_P27S_243	140	144	181	189	187	187	297	297	88	88	264	264	212	214	158	158	341	341
13_P27S_244	140	140	189	213	187	187	297	297	88	88	264	276	222	224	158	164	339	341
13_P27S_245	140	140	189	193	187	187	293	297	80	88	246	260	226	266	152	160	341	341
13_P27S_246	144	148	181	181	187	187	301	305	80	88	236	236	222	228	158	180	341	341
13_P27S_247	140	140	181	193	179	187	297	301	80	88	232	260	234	236	152	154	341	341
13_P27S_248	140	140	181	185	183	187	297	305	88	88	246	276	222	222	154	162	341	341
13_P27S_249	140	140	181	185	175	187	297	297	88	88	210	242	226	240	160	168	341	341
13_P27S_250	140	148	185	189	183	187	289	297	80	88	264	272	228	234	154	162	341	341
13_P1SW_1	136	144	185	185	187	187	297	297	88	88	240	268	222	228	152	152	341	341
13_P1SW_2	140	144	189	197	187	187	289	297	80	88	244	244	224	224	160	160	341	341
13_P1SW_3	140	152	181	181	187	191	297	297	80	88	264	284	222	222	152	162	341	341
13_P1SW_4	140	140	197	209	187	187	-9	-9	88	88	-9	-9	214	252	156	158	341	341
13_P1SW_6	128	128	189	193	187	187	297	297	80	88	244	248	222	252	152	162	341	341
13_P1SW_8	140	156	185	189	187	191	295	299	88	88	232	244	224	224	154	166	-9	-9
13_P1SW_9	136	140	189	189	187	187	297	297	80	88	-9	-9	222	224	156	160	339	341
13_P1SW_10	140	140	173	189	187	187	297	301	88	88	244	262	228	228	158	168	339	341
13_P1SW_11	140	140	193	193	183	187	297	301	80	88	248	254	220	224	152	156	341	341
13_P1SW_12	140	144	193	221	187	187	293	297	88	88	236	246	222	224	150	156	341	341
13_P1SW_13	144	144	185	205	187	187	281	291	84	88	240	264	226	228	154	164	341	341
13_P1SW_14	140	152	189	193	187	187	297	297	88	88	240	292	220	290	152	164	341	341
13_P1SW_15	140	140	189	197	187	187	297	297	88	88	216	216	224	242	150	164	-9	-9
13_P2SW_31	140	140	189	193	187	187	293	301	88	88	232	276	226	228	156	162	341	341
13_P2SW_32	144	164	205	209	187	191	297	301	80	88	232	244	218	222	154	158	341	343
13_P2SW_33	140	140	189	205	187	187	297	301	80	88	244	268	224	248	164	164	341	341
13_P2SW_34	140	144	181	209	187	187	297	305	80	88	236	264	220	224	156	162	339	341
13_P2SW_35	140	144	189	189	187	187	293	333	88	88	260	272	220	248	156	158	339	341
13_P2SW_36	140	144	181	193	187	187	301	301	80	84	246	264	218	224	152	152	341	341
13_P2SW_37	140	140	181	181	187	187	297	301	88	88	244	248	220	226	158	172	341	341
13_P2SW_38	148	148	181	191	175	195	299	299	80	88	256	264	226	230	160	160	341	341
13_P2SW_40	144	144	193	197	187	187	297	297	88	88	212	280	220	230	158	164	339	341
13_P2SW_41	144	152	185	189	187	195	297	305	88	88	256	264	220	224	160	166	341	341
13_P3SW_1	140	172	193	197	187	187	293	297	88	88	258	278	220	232	150	156	341	341
13_P3SW_2	140	152	193	201	187	191	297	297	80	88	262	270	224	232	152	160	-9	-9
13_P3SW_4	140	140	181	185	179	187	297	297	80	80	242	246	222	222	158	158	343	343
13_P3SW_351	140	144	173	185	179	187	293	305	80	88	260	260	222	224	160	164	341	341
13_P3SW_352	140	140	181	181	175	187	293	299	88	88	196	260	222	234	168	168	339	343
13_P3SW_353	140	148	181	191	187	187	-9	-9	88	88	198	226	228	232	160	164	339	341
13_P3SW_354	136	144	181	191	187	187	297	301	88	88	236	268	218	226	152	156	341	341
13_P3SW_355	140	144	185	193	175	187	293	297	88	88	264	288	224	224	158	168	341	341
13_P3SW_356	140	152	181	193	187	191	293	303	88	88	244	244	232	254	156	168	339	341
13_P3SW_357	140	140	181	189	187	191	297	297	88	88	256	264	226	232	162	164	341	341
13_P3SW_358	136	140	193	213	187	191	293	297	84	88	256	272	224	228	158	164	-9	-9
13_P3SW_360	136	144	185	197	179	183	293	297	80	80	252	252	222	252	150	152	341	341
13_P3SW_361	144	164	193	197	187	187	297	297	80	88	236	256	222	228	158	160	341	341
13_P3SW_362	140	140	181	185	187	187	281	297	80	80	200	256	218	266	140	164	341	341
13_P3SW_363	140	152	181	205	187	187	289	295	88	88	256	264	222	222	154	158	341	341
13_P3SW_364	136	140	181	189	179	187	289	293	80	88	196	256	220	230	156	158	341	341
13_P3SW_366	140	144	189	201	187	187	297	299	88	88	-9	-9	226	256	150	164	343	343
13_P3SW_367	140	144	173	185	179	187	293	297	88	88	236	268	220	230	154	156	341	345
13_P3SW_368	128	140	189	189	187	187	-9	-9	88	88	236	236	224	228	162	172	341	341
13_P3SW_369	140	140	177	201	187	187	281	301	88	88	252	280	220	222	154	164	-9	-9
13_P3SW_370	140	140	193	197	179	187	297	301	88	88	240	256	224	244	158	160	341	341
13_C26SW_11P	136	140	189	193	187	187	293	301	88	88	232	258	222	222	156	160	341	341
13_C26SW_12P	136	144	185	201	187	187	297	297	88	88	248	276	218	218	160	162	341	341
13_C26SW_14P	144	156	181	197	175	187	297	299	80	88	208	208	226	226	156	180	-9	-9
13_C26SW_15P	140	140	175	179	185	185	295	295	80	88	-9	-9	230	242	158	192	-9	-9
13_C26SW_17P	136	144	185	205	179	187	295	297	88	88	264	272	222	246	152	166	341	341
13_C26SW_19P	140	156	185	185	187	187	293	297	88	88	234	256	228	248	158	164	341	341
13_C26SW_20P	136	140	177	185	187	187	297	301	80	88	200	284	218	242	160	162	341	341
13_P12SW_1	144	144	185	193	187	195	297	297	88	88	252	282	224	224	158	174	341	341
13_P12SW_2	140	144	181	189	179	187	-9	-9	88	88	246	260	224	240	150	160	341	341
13_P12SW_3	140	140	193	197	187	187	297	297	88	88	244	296	220	224	162	166	339	341
13_P12SW_4	144	160	173	185	187	187	309	325	80	88	240	246	228	234	158	160	341	341
13_P12SW_5	144	144	181	201	179	187	293	293	80	88	244	260	224	226	154	158	339	341
13_P12SW_6	136	152	181	193	187	195	297	299	88	88	244	276	222	224	158	160	341	341
13_P12SW_8	144	160	193	193	187	187	297	297	80	88	240	260	228	262	152	164	341	343
13_P12SW_9	136	140	197	205	175	187	297	309	88	88	268	272	220	224	156	158	341	341
13_P12SW_10	140	148	185	193	175	187	281	281	88	88	252	252	222	230	154	156	341	341
13_P12SW_11	140	140	181	189	187	187	297	301	80	88	246	260	214	224	160	164	341	341
13_P12SW_12	140	144	193	201	187	187	289	297	88	88	250	272	222	230	158	160	341	341
13_P12SW_13	136	148	189	189	183	187	297	297	80	88	260	268	228	242	162	176	341	341
13_P12SW_14	140	144	185	201	187	187	297	301	80	88	240	256	222	228	162	178	341	341
13_P12SW_16	140	140	189	189	175	195	293	313	88	88	248	256	220	250	156	158	341	341
13_P12SW_17	144	144	181	193	187	191	297	297	88	88	236	246	230	250	160	176	341	341
13_P12SW_18	148	156	189	189	187	187	-9	-9	80	88	216	216	228	234	160	162	341	341
13_P12SW_19	136	144	185	185	187	191	295	295	88	88	260	264	228	228	160	180	-9	-9
13_P12SW_20	140	140	181	185	175	187	293	301	80	88	246	276	220	228	156	158	339	341
13_P29SW_1	140	144	197	209	187	187	293	297	80	88	264	272	214	224	152	174	339	341
13_P29SW_2	140	144	197	201	175	187	301	305	80	88	256	264	222	226	152	154	341	341
13_P29SW_3	140	164	193	205	179	187	297	297	88	88	232	268	218	260	158	158	339	341
13_P29SW_4	136	140	185	193	187	191	297	305	88	88	248	276	222	226	158	158	341	341
13_P29SW_5	140	144	181	189	187	187	297	301	80	88	244	264	222	226	154	162	339	341
13_P29SW_6	144	148	185	193	179	191	297	297	88	88	248	256	222	230	158	162	341	341
13_P29SW_7	140	140	189	193	187	187	297	297	80	88	220	246	214	222	160	162	341	341
13_P29SW_8	132	136	177	185	187	187	297	301	88	88	222	258	218	228	164	178	341	341
13_P29SW_9	136	144	189	189	187	187	293	297	88	88	240	252	222	228	158	158	339	341
13_P29SW_10	140	140	173	197	175	187	293	297	88	88	244	256	226	228	162	180	341	341
13_P29SW_11	144	152	189	197	187	195	297	301	88	88	240	252	222	224	158	162	341	341
13_P29SW_12	136	140	185	193	179	187	297	297	80	88	248	254	220	232	158	158	341	341
13_P29SW_13	140	152	185	185	175	187	297	297	88	88	228	236	226	234	150	172	341	341
13_P29SW_14	144	148	193	197	187	191	297	297	88	88	232	246	226	226	160	160	341	341
13_P29SW_15	140	144	193	205	183	187	297	299	88	88	252	260	224	226	150	160	341	341
13_P29SW_16	144	144	185	189	175	187	297	309	80	88	228	244	222	230	158	160	341	341
13_P29SW_17	144	148	189	189	187	187	297	297	88	88	196	248	222	242	156	180	341	341
13_P29SW_18	144	144	181	201	187	187	297	305	88	88	196	250	220	254	160	164	341	341
13_P29SW_19	148	148	205	213	191	191	297	313	80	88	192	252	216	220	158	168	339	341
13_P29SW_20	140	144	181	205	175	187	297	297	80	88	256	260	226	250	162	168	341	341
13_P85SW_1	136	140	-9	-9	175	187	-9	-9	80	88	248	268	218	226	162	162	341	343
13_P85SW_2	136	148	181	201	175	187	293	297	88	88	236	256	226	244	152	164	339	341
13_P85SW_3	144	148	177	189	175	187	289	297	80	88	244	272	216	262	152	160	341	345
13_P85SW_4	136	144	185	197	187	187	295	297	88	88	240	272	224	228	152	162	341	341
13_P85SW_5	144	144	185	189	183	191	295	297	88	88	236	252	214	230	162	162	339	341
13_P85SW_6	140	144	173	193	187	195	297	297	80	88	252	260	228	244	160	164	341	341
13_P85SW_7	140	144	193	197	175	187	297	297	88	88	272	280	220	250	164	174	341	341
13_P85SW_8	140	140	189	193	187	187	293	297	80	80	252	256	222	226	158	176	341	343
13_P85SW_9	140	144	177	185	187	187	297	297	88	88	228	236	228	230	164	164	341	341
13_P85SW_10	140	144	181	189	175	187	301	305	88	88	236	240	222	244	158	162	331	341
13_P63W_1	140	144	173	193	187	191	297	301	88	88	222	252	222	222	158	160	341	343
13_P63W_2	144	144	201	205	187	195	293	297	88	88	278	278	222	228	160	164	341	341
13_P63W_3	140	144	189	189	183	187	289	321	80	88	196	250	226	228	160	174	341	341
13_P63W_4	140	140	181	189	187	187	297	297	80	88	264	264	226	226	158	158	341	341
13_P63W_5	140	148	193	197	171	187	297	297	88	88	244	264	234	268	160	172	341	341
13_P63W_6	140	152	189	197	167	187	297	301	80	88	232	254	230	230	152	156	341	341
13_P63W_7	132	144	177	185	187	195	293	297	80	80	240	280	224	228	172	176	341	341
13_P63W_8	144	152	181	185	175	191	293	293	88	88	232	274	224	224	152	156	341	341
13_P63W_9	148	148	173	181	179	187	293	297	80	88	196	212	220	220	152	166	339	341
13_P63W_10	144	152	189	193	187	187	297	301	88	88	248	264	218	246	158	160	341	341
13_P63W_11	136	168	177	233	187	187	293	301	88	88	224	260	246	248	160	162	339	341
13_P63W_12	140	140	177	185	171	187	-9	-9	88	88	244	276	212	218	152	162	341	341
13_P63W_13	140	148	181	197	175	183	297	297	88	88	246	254	222	224	160	160	341	343
13_P63W_14	148	156	173	185	187	195	295	297	88	88	256	288	220	222	172	172	341	343
13_P63W_15	136	140	181	197	179	187	289	297	80	88	248	256	228	228	160	160	341	341
13_P63W_16	140	140	185	197	175	187	297	297	88	88	240	264	228	228	156	160	341	343
13_P63W_17	140	144	181	193	179	195	297	297	88	88	232	236	230	232	152	162	341	341
13_P63W_18	140	144	189	205	175	187	285	293	80	88	240	264	214	238	150	150	341	343
13_P63W_19	140	144	181	185	187	187	289	309	80	88	228	268	228	228	156	162	341	341
13_P63W_20	140	144	177	189	187	187	297	297	88	88	196	232	216	222	160	160	341	341
13_P75W_1	136	140	185	197	179	187	305	309	80	88	260	268	220	238	150	162	341	341
13_P75W_2	140	140	189	197	187	191	293	297	88	88	264	268	228	228	160	162	339	339
13_P75W_3	140	148	173	189	171	187	297	297	88	88	220	220	224	224	158	162	341	341
13_P75W_4	144	152	181	185	181	187	293	297	88	88	200	268	224	228	162	184	339	341
13_P75W_5	136	140	181	185	187	187	297	297	88	88	196	256	222	226	154	160	341	341
13_P75W_6	144	144	185	205	187	187	297	305	88	88	256	284	222	222	152	168	341	341
13_P75W_7	136	140	173	201	187	187	297	297	80	88	244	288	220	224	152	160	341	341
13_P75W_8	140	144	181	193	179	187	297	333	80	80	220	252	222	226	152	162	341	345
13_P75W_10	140	148	189	189	187	187	293	297	88	88	258	262	220	256	-9	-9	341	341
13_P75W_11	140	144	189	201	175	187	289	295	80	88	240	250	218	222	150	162	341	341
13_P75W_12	140	140	193	205	179	187	293	297	80	88	248	268	214	226	156	160	341	343
13_P75W_13	140	148	185	197	187	187	299	301	80	88	260	264	220	226	158	164	341	341
13_P75W_14	136	140	185	205	187	191	289	297	80	88	256	260	222	282	152	154	341	341
13_P75W_15	140	148	197	201	175	187	297	297	88	88	264	272	224	228	158	162	341	341
13_P75W_16	140	144	177	181	175	175	297	309	88	88	244	256	222	244	150	164	339	341
13_P75W_17	140	168	189	217	187	187	289	297	80	88	244	268	224	268	160	182	337	341
13_P75W_18	140	144	177	189	175	187	297	305	80	88	240	256	216	216	160	160	339	341
13_P75W_19	144	144	193	209	187	187	295	301	88	88	272	276	228	228	156	162	341	341
13_P93W_1	140	140	189	197	187	187	289	305	84	88	252	272	222	224	160	162	341	343
13_P93W_2	140	140	173	193	175	187	297	297	84	88	224	260	-9	-9	152	158	341	341
13_P93W_3	140	144	185	185	187	187	293	297	88	88	246	280	222	228	164	164	341	343
13_P93W_4	156	160	181	185	187	187	297	301	88	88	242	276	226	226	164	164	341	341
13_P93W_5	140	140	185	185	187	187	297	297	88	88	244	264	224	228	158	164	341	341
13_P93W_7	136	140	189	201	183	195	297	301	84	88	232	264	228	244	154	162	339	341
13_P93W_8	148	160	177	193	183	187	293	301	80	88	232	246	220	232	158	164	341	341
13_P93W_9	136	156	185	185	175	175	297	297	80	88	200	228	222	230	160	170	341	343
13_P93W_10	136	156	185	189	187	187	297	297	88	88	-9	-9	222	240	152	156	341	341
13_P100W_1	144	148	177	201	179	187	297	305	88	88	228	244	-9	-9	-9	-9	341	341
13_P100W_2	148	156	181	181	175	187	297	337	88	88	256	272	226	246	156	160	339	341
13_P100W_3	136	148	181	185	187	191	297	301	88	88	232	236	222	224	168	172	341	343
13_P100W_4	144	148	193	217	187	187	293	305	88	88	196	216	222	258	152	160	341	341
13_P100W_5	144	152	189	189	187	191	297	305	88	88	200	260	228	234	152	158	341	341
13_P100W_6	136	140	185	189	187	187	285	297	88	88	240	240	230	260	154	158	341	341
13_P100W_7	140	140	185	189	183	187	297	297	80	88	256	268	222	238	156	160	341	341
13_P100W_8	144	144	181	197	187	195	297	297	80	88	268	268	222	228	160	162	341	341
13_P100W_9	140	148	193	193	187	187	297	297	88	88	248	296	228	230	-9	-9	341	343
13_P100W_10	136	156	181	189	187	187	297	297	80	88	232	232	222	222	-9	-9	341	341
13_P100W_11	140	140	181	189	187	187	297	297	88	88	236	246	222	226	154	156	339	341
13_P100W_12	144	144	193	217	187	191	297	305	80	88	216	240	220	222	150	164	341	341
13_P100W_13	144	148	189	201	183	191	293	297	88	88	252	280	246	248	152	164	341	341
13_P100W_14	144	152	177	177	187	187	-9	-9	88	88	246	254	248	248	152	160	341	341
13_P100W_15	140	148	177	189	187	187	-9	-9	80	88	248	258	220	228	164	164	341	341
13_P100W_16	140	144	185	205	187	187	285	309	80	88	228	250	238	272	156	160	341	341
13_P100W_17	144	148	189	189	185	187	297	297	88	88	236	256	214	232	142	168	339	341
13_P100W_18	148	156	185	189	187	187	297	297	80	88	248	276	222	224	152	164	341	341
13_P100W_19	140	144	181	189	187	187	-9	-9	88	88	230	270	228	240	152	178	341	341
13_P100W_20	140	140	189	197	187	187	297	309	88	88	268	296	214	228	158	168	341	341
13_P130W_2	140	144	183	189	187	187	297	297	88	88	256	272	220	238	156	158	341	341
13_P130W_3	140	148	177	189	175	187	297	301	88	88	248	256	222	228	162	170	339	341
13_P130W_4	140	144	189	197	187	187	297	301	88	88	200	220	212	222	150	156	341	341
13_P130W_5	136	148	193	197	187	187	293	301	88	88	268	268	214	216	162	166	341	341
13_P130W_6	140	144	181	205	175	187	293	301	80	88	244	276	216	246	150	156	341	341
13_P130W_7	140	152	189	197	187	191	297	297	80	88	240	256	242	246	150	156	341	341
13_P130W_8	140	140	185	193	179	195	297	305	88	88	216	248	218	222	156	160	341	341
13_P130W_9	140	160	185	197	183	187	297	317	88	88	236	240	214	220	160	180	341	343
13_P130W_10	140	140	177	189	175	187	297	301	88	88	268	276	224	228	160	160	341	343
13_P130W_11	136	144	177	193	187	187	293	305	88	88	246	252	220	248	158	158	341	341
13_P130W_12	144	144	185	193	179	187	295	309	88	88	268	272	216	228	150	158	337	341
13_P130W_13	136	144	173	181	175	187	297	297	80	88	240	256	220	224	158	162	339	341
13_P130W_14	144	148	189	189	187	187	-9	-9	80	88	196	232	224	236	158	158	339	341
13_P130W_15	140	148	181	185	175	187	-9	-9	88	88	244	276	222	224	152	162	341	341
13_P130W_16	140	148	189	205	187	191	297	305	88	88	240	260	222	224	150	154	341	341
13_P130W_17	140	140	189	193	183	187	297	313	80	88	248	256	228	228	152	158	-9	-9
13_P130W_18	140	156	181	197	187	187	299	301	88	88	252	264	218	234	154	154	341	341
13_P130W_19	144	144	185	189	187	187	297	297	88	88	200	252	216	226	162	162	341	341
13_P130W_20	136	144	193	193	187	195	293	297	88	88	220	260	226	250	158	162	341	341
13_P42N_1	140	140	189	193	191	195	289	333	80	88	240	252	220	222	158	158	339	341
13_P42N_2	144	152	205	209	187	187	297	301	88	88	252	264	216	226	154	160	341	341
13_P42N_3	140	144	181	209	179	187	297	297	80	88	260	260	222	222	150	158	341	341
13_P42N_4	140	140	181	189	187	187	297	313	80	88	260	272	222	254	158	164	341	341
13_P42N_5	140	156	173	201	191	195	297	297	88	88	236	260	228	232	160	164	341	341
13_P42N_6	140	152	181	193	185	187	293	293	80	88	252	268	220	238	160	164	341	341
13_P42N_7	144	148	189	193	187	195	297	297	88	88	240	264	224	224	164	164	341	341
13_P42N_8	140	140	221	221	175	187	309	313	80	88	236	260	224	224	160	168	333	341
13_P42N_9	140	160	185	201	175	187	297	301	88	88	248	284	224	228	164	168	341	341
13_P42N_10	132	140	173	201	187	187	293	297	88	88	246	256	224	230	160	162	341	341
13_P42N_11	144	148	181	193	187	187	297	305	88	88	252	264	224	228	156	156	335	341
13_P42N_12	140	144	181	193	183	187	297	301	88	88	248	276	226	228	158	158	341	341
13_P42N_13	140	140	189	197	179	185	297	297	88	88	254	288	226	246	156	160	341	341
13_P42N_15	148	148	189	197	187	187	297	305	80	88	254	284	224	264	156	168	335	341
13_P42N_17	144	144	177	185	187	187	-9	-9	88	92	-9	-9	224	224	158	164	341	341
13_P56N_1	140	140	173	181	171	187	297	297	88	88	236	264	226	226	156	160	341	341
13_P56N_2	136	140	185	189	187	187	281	297	88	88	236	260	220	242	150	150	341	341
13_P56N_3	140	140	189	193	187	191	289	297	80	88	236	276	226	226	150	162	341	341
13_P56N_4	140	140	173	185	179	179	281	293	88	88	212	216	234	250	154	160	341	341
13_P56N_5	144	148	181	193	187	191	297	297	84	88	252	268	222	222	158	168	-9	-9
13_P56N_6	140	140	193	205	175	187	297	301	88	88	256	272	216	222	150	160	341	341
13_P56N_7	140	140	189	193	187	187	-9	-9	88	88	242	258	226	252	160	164	341	341
13_P56N_8	140	140	185	185	187	195	289	297	88	88	260	280	228	246	162	164	341	341
13_P56N_9	140	140	189	197	179	187	289	297	88	88	200	244	220	236	154	162	341	341
13_P56N_10	144	144	177	197	187	191	297	317	80	88	258	266	218	226	160	162	339	341
13_P56N_11	136	144	177	181	179	187	293	297	88	88	262	262	224	224	156	160	339	341
13_P56N_12	144	148	181	193	187	199	289	293	80	88	256	264	234	242	162	168	341	341
13_P56N_13	140	140	185	193	187	187	-9	-9	88	88	250	250	224	248	152	158	341	341
13_P56N_14	136	148	-9	-9	187	191	-9	-9	88	88	254	258	222	224	158	158	341	341
13_P56N_16	140	140	185	197	171	187	297	297	80	80	256	264	218	232	158	160	341	341
13_P56N_17	144	144	185	193	181	191	297	309	80	88	-9	-9	214	226	152	162	339	341
13_P56N_18	136	140	173	201	179	187	293	297	88	88	248	256	224	268	156	164	341	343
13_P56N_19	140	144	189	189	187	187	-9	-9	84	88	-9	-9	224	224	158	160	341	341
13_P56N_20	136	140	189	197	187	187	-9	-9	88	88	234	254	230	242	154	156	-9	-9
13_P56N_21	144	148	173	217	175	179	281	305	80	88	260	268	224	224	156	162	341	341
13_P56N_24	140	144	181	193	187	187	297	297	88	88	240	246	220	256	154	162	341	341
13_P56N_25	140	144	193	197	179	187	297	301	80	88	252	260	228	228	162	166	339	341
13_P56N_27	140	144	193	197	175	187	293	297	84	88	248	260	246	262	146	164	341	341
13_P92N_1	144	148	177	189	175	187	285	297	88	88	236	256	222	222	156	160	-9	-9
13_P92N_2	140	140	193	205	175	187	297	297	88	88	240	268	220	222	152	158	-9	-9
13_P92N_3	-9	-9	189	189	187	187	297	297	88	88	220	256	232	232	144	158	337	341
13_P92N_4	140	168	181	197	187	187	295	297	88	88	244	252	224	228	152	172	341	341
13_P92N_5	140	140	197	201	175	187	297	297	88	88	236	248	-9	-9	152	152	339	341
13_P92N_6	136	144	189	191	175	187	-9	-9	88	88	-9	-9	220	230	156	176	341	341
13_P92N_8	144	152	181	185	187	187	297	309	88	96	236	246	226	272	150	152	339	341
13_P92N_9	148	156	173	205	175	175	297	301	88	88	260	288	218	218	158	158	341	341
13_P92N_10	140	140	181	197	187	187	297	305	88	88	252	276	216	218	156	158	341	341
13_P92N_11	140	140	177	185	187	187	297	297	88	88	252	260	222	222	160	162	341	341
13_P92N_12	140	144	201	209	175	179	289	297	88	88	208	236	228	228	158	158	341	341
13_P92N_13	140	148	181	205	187	187	297	297	80	88	240	240	226	230	158	162	-9	-9
13_P92N_14	140	156	193	213	187	187	293	297	88	88	256	276	222	224	148	162	339	341
13_P92N_15	140	152	181	185	187	195	297	309	88	88	272	272	232	232	148	162	341	343
13_P109N_1	144	152	189	193	187	187	293	297	88	88	248	264	218	242	162	170	341	341
13_P109N_2	140	140	173	197	187	187	293	301	88	88	260	264	222	224	158	162	335	341
13_P109N_3	140	144	181	189	187	187	297	305	88	88	232	236	228	248	150	158	339	341
13_P109N_5	140	148	185	221	181	187	297	301	88	88	252	256	220	230	150	150	341	341
13_P109N_6	140	144	185	189	187	187	297	297	88	88	252	264	214	222	148	164	341	341
13_P109N_7	148	148	181	197	179	199	297	297	88	88	244	264	222	264	152	164	341	343
13_P109N_8	136	140	181	193	175	187	297	297	80	80	196	228	224	248	156	160	341	341
13_P109N_9	136	140	181	193	183	187	289	301	88	88	232	244	214	226	162	168	339	341
13_P109N_10	140	152	193	209	175	187	297	301	80	88	216	264	220	220	150	160	341	341
13_P109N_11	140	144	173	193	187	187	297	297	84	88	236	264	214	244	152	160	341	341
13_P109N_12	140	152	173	189	187	195	293	301	88	88	216	232	246	254	150	170	341	341
13_P109N_13	140	144	137	173	187	187	-9	-9	88	88	244	288	224	228	152	154	341	341
13_P109N_14	140	140	181	189	187	191	293	313	80	88	232	256	216	224	154	154	341	343
13_P109N_16	140	144	185	197	187	199	259	297	88	88	224	272	230	232	164	170	341	341
13_P109N_17	140	148	173	185	187	195	293	297	-9	-9	236	256	226	234	158	170	341	341
13_P109N_18	136	140	189	209	179	187	293	297	88	88	260	260	214	238	154	164	341	341
13_P109N_19	132	160	185	205	187	187	297	297	88	88	200	232	218	222	150	154	339	341
13_P109N_20	140	140	181	197	187	191	297	301	80	80	260	264	222	226	160	168	341	341
13_P109N_21	140	148	185	189	183	185	293	297	88	88	256	268	220	222	154	154	341	341
13_P109N_22	144	148	185	189	187	187	-9	-9	88	88	248	264	216	216	164	164	339	339
13_P109N_23	140	144	185	189	183	195	-9	-9	80	88	232	232	222	234	156	158	341	341
13_P109N_24	140	144	189	213	175	187	293	297	80	88	264	272	218	228	158	160	341	341
13_P109N_25	136	148	189	189	187	191	289	301	88	88	248	264	214	248	158	158	341	341
13_P109N_26	140	140	177	185	187	187	297	317	88	88	256	260	224	228	152	152	341	345
13_P109N_27	148	184	189	229	187	195	297	301	88	88	236	240	222	294	154	158	341	341
13_P109N_28	140	140	181	193	185	185	297	297	88	88	256	272	226	242	160	160	341	341
13_P109N_30	144	148	-9	-9	179	187	293	297	88	88	-9	-9	214	226	164	164	341	341
13_P178N_01	136	148	185	193	187	187	297	297	88	88	248	260	222	222	152	154	-9	-9
13_P178N_02	140	144	181	185	187	187	297	297	80	88	260	264	224	224	152	154	341	341
13_P178N_03	136	144	169	193	175	187	289	305	88	88	236	256	220	222	150	162	341	341
13_P178N_04	136	144	185	189	175	187	293	297	88	88	246	264	228	234	144	158	341	341
13_P178N_05	140	144	189	217	187	187	297	297	80	88	280	280	222	256	158	158	341	343
13_P178N_06	140	144	193	201	171	191	297	297	88	88	236	252	226	226	-9	-9	339	341
13_P178N_07	140	144	189	197	175	195	289	301	80	88	264	268	222	236	164	170	339	341
13_P178N_08	140	144	181	193	187	187	293	297	80	88	240	268	232	234	158	164	339	341
13_P178N_09	148	184	-9	-9	179	187	-9	-9	80	88	242	268	222	236	164	190	339	341
13_P178N_10	144	144	189	209	179	187	297	301	88	88	232	246	224	224	150	152	341	341
13_P178N_12	144	160	189	197	175	191	289	297	88	88	232	252	226	234	162	162	341	341
13_P178N_13	140	144	185	189	187	187	289	297	88	88	252	264	238	286	150	160	341	341
13_P178N_14	140	148	185	201	187	191	297	309	88	88	244	264	214	236	154	160	341	341
13_P178N_15	140	144	189	193	175	187	297	297	88	88	256	264	222	268	152	156	341	341
13_P178N_16	140	144	181	197	179	187	297	297	88	88	264	278	222	224	154	174	-9	-9
13_P178N_17	140	140	189	193	187	187	297	297	80	88	252	264	220	270	156	164	341	341
13_P178N_18	136	140	185	189	175	187	289	293	88	88	248	264	220	228	162	166	341	341
13_P178N_19	136	140	181	205	179	187	285	297	88	88	248	260	232	272	154	154	341	341
13_P178N_20	140	164	185	213	187	187	297	297	88	88	208	264	216	222	152	164	339	341
13_P178N_21	140	156	181	223	187	187	293	297	80	88	246	264	224	226	160	164	341	341
13_P178N_22	148	148	201	221	187	195	281	297	80	88	200	256	228	236	158	160	341	341
